# Supplementary material for: Exploring the impact, response and preparedness to water-related natural disasters in the Barisal division of Bangladesh: a mixed methods study
Source: PubMed Central journal article supplement — BMJ Open. 2019 Apr 4;9(4):e026459. doi: 10.1136/bmjopen-2018-026459 (PMC6500363; doi:10.1136/bmjopen-2018-026459), 2019-04-04
Supplement: bmjopen-2018-026459supp002.pdf [file bmjopen-2018-026459supp002.pdf]

## BHASA (AFLOAT)

### Baseline Survey Questionnaire

| Question                                                                                                                                                                                                | Respondent's answer                                                                                                                                                                                                                                                                                                                                                                                                                                                                                                                                                                                                                                                                                                                                                                                    |    |                                               |   |                                      |   |                                            |    |                                     |   |                 |    |                                         |   |                  |    |                        |   |                  |    |                                         |   |                                      |    |                    |
|---------------------------------------------------------------------------------------------------------------------------------------------------------------------------------------------------------|--------------------------------------------------------------------------------------------------------------------------------------------------------------------------------------------------------------------------------------------------------------------------------------------------------------------------------------------------------------------------------------------------------------------------------------------------------------------------------------------------------------------------------------------------------------------------------------------------------------------------------------------------------------------------------------------------------------------------------------------------------------------------------------------------------|----|-----------------------------------------------|---|--------------------------------------|---|--------------------------------------------|----|-------------------------------------|---|-----------------|----|-----------------------------------------|---|------------------|----|------------------------|---|------------------|----|-----------------------------------------|---|--------------------------------------|----|--------------------|
| <b>Section G - Natural Disaster Details</b> অধ্যায় G এর জন্য সাক্ষাৎকারে অংশগ্রহণকারী উত্তরদাতার নাম                                                                                                   |                                                                                                                                                                                                                                                                                                                                                                                                                                                                                                                                                                                                                                                                                                                                                                                                        |    |                                               |   |                                      |   |                                            |    |                                     |   |                 |    |                                         |   |                  |    |                        |   |                  |    |                                         |   |                                      |    |                    |
| উত্তরদাতার নাম ( অধ্যায়-জি )<br>Name of respondent interviewed for Section G<br>নাম                                                                                                                    |                                                                                                                                                                                                                                                                                                                                                                                                                                                                                                                                                                                                                                                                                                                                                                                                        |    |                                               |   |                                      |   |                                            |    |                                     |   |                 |    |                                         |   |                  |    |                        |   |                  |    |                                         |   |                                      |    |                    |
| আপনি কি কি ধরনের প্রাকৃতিক দুর্যোগের কথা জানেন?<br>How many kinds of natural disasters can you think of?<br><br>একাধিক উত্তর হতে পারে<br>Multiple responses possible<br>কি কি ধরনের প্রাকৃতিক দুর্যোগের | <table border="1" style="width: 100%; border-collapse: collapse;"> <tr> <td style="width: 5%;">1</td> <td style="width: 55%;">সাইক্লোন/বড় ধরনের ঝড়<br/>Cyclones/big storms</td> <td style="width: 5%;">5</td> <td style="width: 35%;">রোগ Disease</td> </tr> <tr> <td>2</td> <td>বন্যা Flooding</td> <td>99</td> <td>জানিনা Don't know</td> </tr> <tr> <td>3</td> <td>সুনামি Tsunami</td> <td>97</td> <td>অন্যান্য (উল্লেখ করুন) Others (specify)</td> </tr> <tr> <td>4</td> <td>ভূমিধস Landslide</td> <td></td> <td></td> </tr> </table>                                                                                                                                                                                                                                                            | 1  | সাইক্লোন/বড় ধরনের ঝড়<br>Cyclones/big storms | 5 | রোগ Disease                          | 2 | বন্যা Flooding                             | 99 | জানিনা Don't know                   | 3 | সুনামি Tsunami  | 97 | অন্যান্য (উল্লেখ করুন) Others (specify) | 4 | ভূমিধস Landslide |    |                        |   |                  |    |                                         |   |                                      |    |                    |
| 1                                                                                                                                                                                                       | সাইক্লোন/বড় ধরনের ঝড়<br>Cyclones/big storms                                                                                                                                                                                                                                                                                                                                                                                                                                                                                                                                                                                                                                                                                                                                                          | 5  | রোগ Disease                                   |   |                                      |   |                                            |    |                                     |   |                 |    |                                         |   |                  |    |                        |   |                  |    |                                         |   |                                      |    |                    |
| 2                                                                                                                                                                                                       | বন্যা Flooding                                                                                                                                                                                                                                                                                                                                                                                                                                                                                                                                                                                                                                                                                                                                                                                         | 99 | জানিনা Don't know                             |   |                                      |   |                                            |    |                                     |   |                 |    |                                         |   |                  |    |                        |   |                  |    |                                         |   |                                      |    |                    |
| 3                                                                                                                                                                                                       | সুনামি Tsunami                                                                                                                                                                                                                                                                                                                                                                                                                                                                                                                                                                                                                                                                                                                                                                                         | 97 | অন্যান্য (উল্লেখ করুন) Others (specify)       |   |                                      |   |                                            |    |                                     |   |                 |    |                                         |   |                  |    |                        |   |                  |    |                                         |   |                                      |    |                    |
| 4                                                                                                                                                                                                       | ভূমিধস Landslide                                                                                                                                                                                                                                                                                                                                                                                                                                                                                                                                                                                                                                                                                                                                                                                       |    |                                               |   |                                      |   |                                            |    |                                     |   |                 |    |                                         |   |                  |    |                        |   |                  |    |                                         |   |                                      |    |                    |
| অন্যান্য_উল্লেখ করুন Others specify                                                                                                                                                                     |                                                                                                                                                                                                                                                                                                                                                                                                                                                                                                                                                                                                                                                                                                                                                                                                        |    |                                               |   |                                      |   |                                            |    |                                     |   |                 |    |                                         |   |                  |    |                        |   |                  |    |                                         |   |                                      |    |                    |
| আপনার মতে এ এলাকায় কোন ধরনের প্রাকৃতিক দুর্যোগে সবচেয়ে বেশি ক্ষতি হয়?<br>Which natural disaster do you think is the biggest problem for your area?<br>প্রাকৃতিক দুর্যোগে ক্ষতি                       | <table border="1" style="width: 100%; border-collapse: collapse;"> <tr> <td style="width: 5%;">1</td> <td style="width: 55%;">বন্যা/আকস্মিক বন্যা Flooding/flashflood</td> <td style="width: 5%;">7</td> <td style="width: 35%;">কালবৈশাখী Nor westers</td> </tr> <tr> <td>2</td> <td>সাইক্লোন/বড় ধরনের ঝড় Cyclones/big storms</td> <td>8</td> <td>জলোচ্ছ্বাস Tidal surge</td> </tr> <tr> <td>3</td> <td>টর্নেডো Tornado</td> <td>9</td> <td>নদী ভাঙ্গন Riverbank erosion</td> </tr> <tr> <td>4</td> <td>সুনামি Tsunami</td> <td>10</td> <td>রোগ Disease</td> </tr> <tr> <td>5</td> <td>ভূমিধস Landslide</td> <td>97</td> <td>অন্যান্য (উল্লেখ করুন) Other (specify)</td> </tr> <tr> <td>6</td> <td>ভারী বর্ষন/অতি বৃষ্টি Heavy rainfall</td> <td>99</td> <td>জানি না Don't know</td> </tr> </table> | 1  | বন্যা/আকস্মিক বন্যা Flooding/flashflood       | 7 | কালবৈশাখী Nor westers                | 2 | সাইক্লোন/বড় ধরনের ঝড় Cyclones/big storms | 8  | জলোচ্ছ্বাস Tidal surge              | 3 | টর্নেডো Tornado | 9  | নদী ভাঙ্গন Riverbank erosion            | 4 | সুনামি Tsunami   | 10 | রোগ Disease            | 5 | ভূমিধস Landslide | 97 | অন্যান্য (উল্লেখ করুন) Other (specify)  | 6 | ভারী বর্ষন/অতি বৃষ্টি Heavy rainfall | 99 | জানি না Don't know |
| 1                                                                                                                                                                                                       | বন্যা/আকস্মিক বন্যা Flooding/flashflood                                                                                                                                                                                                                                                                                                                                                                                                                                                                                                                                                                                                                                                                                                                                                                | 7  | কালবৈশাখী Nor westers                         |   |                                      |   |                                            |    |                                     |   |                 |    |                                         |   |                  |    |                        |   |                  |    |                                         |   |                                      |    |                    |
| 2                                                                                                                                                                                                       | সাইক্লোন/বড় ধরনের ঝড় Cyclones/big storms                                                                                                                                                                                                                                                                                                                                                                                                                                                                                                                                                                                                                                                                                                                                                             | 8  | জলোচ্ছ্বাস Tidal surge                        |   |                                      |   |                                            |    |                                     |   |                 |    |                                         |   |                  |    |                        |   |                  |    |                                         |   |                                      |    |                    |
| 3                                                                                                                                                                                                       | টর্নেডো Tornado                                                                                                                                                                                                                                                                                                                                                                                                                                                                                                                                                                                                                                                                                                                                                                                        | 9  | নদী ভাঙ্গন Riverbank erosion                  |   |                                      |   |                                            |    |                                     |   |                 |    |                                         |   |                  |    |                        |   |                  |    |                                         |   |                                      |    |                    |
| 4                                                                                                                                                                                                       | সুনামি Tsunami                                                                                                                                                                                                                                                                                                                                                                                                                                                                                                                                                                                                                                                                                                                                                                                         | 10 | রোগ Disease                                   |   |                                      |   |                                            |    |                                     |   |                 |    |                                         |   |                  |    |                        |   |                  |    |                                         |   |                                      |    |                    |
| 5                                                                                                                                                                                                       | ভূমিধস Landslide                                                                                                                                                                                                                                                                                                                                                                                                                                                                                                                                                                                                                                                                                                                                                                                       | 97 | অন্যান্য (উল্লেখ করুন) Other (specify)        |   |                                      |   |                                            |    |                                     |   |                 |    |                                         |   |                  |    |                        |   |                  |    |                                         |   |                                      |    |                    |
| 6                                                                                                                                                                                                       | ভারী বর্ষন/অতি বৃষ্টি Heavy rainfall                                                                                                                                                                                                                                                                                                                                                                                                                                                                                                                                                                                                                                                                                                                                                                   | 99 | জানি না Don't know                            |   |                                      |   |                                            |    |                                     |   |                 |    |                                         |   |                  |    |                        |   |                  |    |                                         |   |                                      |    |                    |
| অন্যান্য_উল্লেখ করুন Others specify                                                                                                                                                                     |                                                                                                                                                                                                                                                                                                                                                                                                                                                                                                                                                                                                                                                                                                                                                                                                        |    |                                               |   |                                      |   |                                            |    |                                     |   |                 |    |                                         |   |                  |    |                        |   |                  |    |                                         |   |                                      |    |                    |
| গত ৫ বছরের মধ্যে আপনি কোন ধরনের প্রাকৃতিক দুর্যোগের সম্মুখীন হয়েছিলেন কি?<br>Have you experienced any natural disaster in the past 5 years?<br>দুর্যোগের সম্মুখীন                                      | <table border="1" style="width: 100%; border-collapse: collapse;"> <tr> <td style="width: 5%;">1</td> <td style="width: 95%;">হ্যাঁ Yes</td> </tr> <tr> <td>2</td> <td>না No</td> </tr> </table>                                                                                                                                                                                                                                                                                                                                                                                                                                                                                                                                                                                                       | 1  | হ্যাঁ Yes                                     | 2 | না No                                |   |                                            |    |                                     |   |                 |    |                                         |   |                  |    |                        |   |                  |    |                                         |   |                                      |    |                    |
| 1                                                                                                                                                                                                       | হ্যাঁ Yes                                                                                                                                                                                                                                                                                                                                                                                                                                                                                                                                                                                                                                                                                                                                                                                              |    |                                               |   |                                      |   |                                            |    |                                     |   |                 |    |                                         |   |                  |    |                        |   |                  |    |                                         |   |                                      |    |                    |
| 2                                                                                                                                                                                                       | না No                                                                                                                                                                                                                                                                                                                                                                                                                                                                                                                                                                                                                                                                                                                                                                                                  |    |                                               |   |                                      |   |                                            |    |                                     |   |                 |    |                                         |   |                  |    |                        |   |                  |    |                                         |   |                                      |    |                    |
| গত ৫ বছরের মধ্যে আপনি কতবার প্রাকৃতিক দুর্যোগের সম্মুখীন হয়েছিলেন?<br>How many times have you experienced a natural disaster in the last 5 years?<br>কতবার                                             |                                                                                                                                                                                                                                                                                                                                                                                                                                                                                                                                                                                                                                                                                                                                                                                                        |    |                                               |   |                                      |   |                                            |    |                                     |   |                 |    |                                         |   |                  |    |                        |   |                  |    |                                         |   |                                      |    |                    |
| গত ৫ বছরে ঘটে যাওয়া শেষ তিনটি প্রাকৃতিক দুর্যোগগুলো কি কি? (প্রথম ঘটনা)<br>What was the most recent disaster event you have experienced?                                                               | <table border="1" style="width: 100%; border-collapse: collapse;"> <tr> <td style="width: 5%;">1</td> <td style="width: 55%;">বন্যা/আকস্মিক বন্যা Flood/Flash flood</td> <td style="width: 5%;">6</td> <td style="width: 35%;">ভারী বর্ষন/অতি বৃষ্টি Heavy rainfall</td> </tr> <tr> <td>2</td> <td>সাইক্লোন/বড় ধরনের ঝড় Cyclone</td> <td>7</td> <td>কালবৈশাখী Nor westers(Kalbaishakhi)</td> </tr> <tr> <td>3</td> <td>টর্নেডো Tornado</td> <td>8</td> <td>নদী ভাঙ্গন Riverbank erosion</td> </tr> <tr> <td>4</td> <td>সুনামি Tsunami</td> <td>9</td> <td>জলোচ্ছ্বাস Tidal surge</td> </tr> <tr> <td>5</td> <td>ভূমিধস Landslide</td> <td>97</td> <td>অন্যান্য (উল্লেখ করুন) Others (specify)</td> </tr> </table>                                                                                    | 1  | বন্যা/আকস্মিক বন্যা Flood/Flash flood         | 6 | ভারী বর্ষন/অতি বৃষ্টি Heavy rainfall | 2 | সাইক্লোন/বড় ধরনের ঝড় Cyclone             | 7  | কালবৈশাখী Nor westers(Kalbaishakhi) | 3 | টর্নেডো Tornado | 8  | নদী ভাঙ্গন Riverbank erosion            | 4 | সুনামি Tsunami   | 9  | জলোচ্ছ্বাস Tidal surge | 5 | ভূমিধস Landslide | 97 | অন্যান্য (উল্লেখ করুন) Others (specify) |   |                                      |    |                    |
| 1                                                                                                                                                                                                       | বন্যা/আকস্মিক বন্যা Flood/Flash flood                                                                                                                                                                                                                                                                                                                                                                                                                                                                                                                                                                                                                                                                                                                                                                  | 6  | ভারী বর্ষন/অতি বৃষ্টি Heavy rainfall          |   |                                      |   |                                            |    |                                     |   |                 |    |                                         |   |                  |    |                        |   |                  |    |                                         |   |                                      |    |                    |
| 2                                                                                                                                                                                                       | সাইক্লোন/বড় ধরনের ঝড় Cyclone                                                                                                                                                                                                                                                                                                                                                                                                                                                                                                                                                                                                                                                                                                                                                                         | 7  | কালবৈশাখী Nor westers(Kalbaishakhi)           |   |                                      |   |                                            |    |                                     |   |                 |    |                                         |   |                  |    |                        |   |                  |    |                                         |   |                                      |    |                    |
| 3                                                                                                                                                                                                       | টর্নেডো Tornado                                                                                                                                                                                                                                                                                                                                                                                                                                                                                                                                                                                                                                                                                                                                                                                        | 8  | নদী ভাঙ্গন Riverbank erosion                  |   |                                      |   |                                            |    |                                     |   |                 |    |                                         |   |                  |    |                        |   |                  |    |                                         |   |                                      |    |                    |
| 4                                                                                                                                                                                                       | সুনামি Tsunami                                                                                                                                                                                                                                                                                                                                                                                                                                                                                                                                                                                                                                                                                                                                                                                         | 9  | জলোচ্ছ্বাস Tidal surge                        |   |                                      |   |                                            |    |                                     |   |                 |    |                                         |   |                  |    |                        |   |                  |    |                                         |   |                                      |    |                    |
| 5                                                                                                                                                                                                       | ভূমিধস Landslide                                                                                                                                                                                                                                                                                                                                                                                                                                                                                                                                                                                                                                                                                                                                                                                       | 97 | অন্যান্য (উল্লেখ করুন) Others (specify)       |   |                                      |   |                                            |    |                                     |   |                 |    |                                         |   |                  |    |                        |   |                  |    |                                         |   |                                      |    |                    |
| অন্যান্য (উল্লেখ করুন)Others (Specify)                                                                                                                                                                  |                                                                                                                                                                                                                                                                                                                                                                                                                                                                                                                                                                                                                                                                                                                                                                                                        |    |                                               |   |                                      |   |                                            |    |                                     |   |                 |    |                                         |   |                  |    |                        |   |                  |    |                                         |   |                                      |    |                    |
| গত ৫ বছরে ঘটে যাওয়া শেষ তিনটি প্রাকৃতিক দুর্যোগগুলো কি কি? (দ্বিতীয় ঘটনা)<br>What was the second most recent disaster event you have experienced?                                                     | <table border="1" style="width: 100%; border-collapse: collapse;"> <tr> <td style="width: 5%;">1</td> <td style="width: 55%;">বন্যা/আকস্মিক বন্যা Flood/Flash flood</td> <td style="width: 5%;">6</td> <td style="width: 35%;">ভারী বর্ষন/অতি বৃষ্টি Heavy rainfall</td> </tr> <tr> <td>2</td> <td>সাইক্লোন/বড় ধরনের ঝড় Cyclone</td> <td>7</td> <td>কালবৈশাখী Nor westers(Kalbaishakhi)</td> </tr> <tr> <td>3</td> <td>টর্নেডো Tornado</td> <td>8</td> <td>নদী ভাঙ্গন Riverbank erosion</td> </tr> <tr> <td>4</td> <td>সুনামি Tsunami</td> <td>9</td> <td>জলোচ্ছ্বাস Tidal surge</td> </tr> <tr> <td>5</td> <td>ভূমিধস Landslide</td> <td>97</td> <td>অন্যান্য (উল্লেখ করুন) Others (specify)</td> </tr> </table>                                                                                    | 1  | বন্যা/আকস্মিক বন্যা Flood/Flash flood         | 6 | ভারী বর্ষন/অতি বৃষ্টি Heavy rainfall | 2 | সাইক্লোন/বড় ধরনের ঝড় Cyclone             | 7  | কালবৈশাখী Nor westers(Kalbaishakhi) | 3 | টর্নেডো Tornado | 8  | নদী ভাঙ্গন Riverbank erosion            | 4 | সুনামি Tsunami   | 9  | জলোচ্ছ্বাস Tidal surge | 5 | ভূমিধস Landslide | 97 | অন্যান্য (উল্লেখ করুন) Others (specify) |   |                                      |    |                    |
| 1                                                                                                                                                                                                       | বন্যা/আকস্মিক বন্যা Flood/Flash flood                                                                                                                                                                                                                                                                                                                                                                                                                                                                                                                                                                                                                                                                                                                                                                  | 6  | ভারী বর্ষন/অতি বৃষ্টি Heavy rainfall          |   |                                      |   |                                            |    |                                     |   |                 |    |                                         |   |                  |    |                        |   |                  |    |                                         |   |                                      |    |                    |
| 2                                                                                                                                                                                                       | সাইক্লোন/বড় ধরনের ঝড় Cyclone                                                                                                                                                                                                                                                                                                                                                                                                                                                                                                                                                                                                                                                                                                                                                                         | 7  | কালবৈশাখী Nor westers(Kalbaishakhi)           |   |                                      |   |                                            |    |                                     |   |                 |    |                                         |   |                  |    |                        |   |                  |    |                                         |   |                                      |    |                    |
| 3                                                                                                                                                                                                       | টর্নেডো Tornado                                                                                                                                                                                                                                                                                                                                                                                                                                                                                                                                                                                                                                                                                                                                                                                        | 8  | নদী ভাঙ্গন Riverbank erosion                  |   |                                      |   |                                            |    |                                     |   |                 |    |                                         |   |                  |    |                        |   |                  |    |                                         |   |                                      |    |                    |
| 4                                                                                                                                                                                                       | সুনামি Tsunami                                                                                                                                                                                                                                                                                                                                                                                                                                                                                                                                                                                                                                                                                                                                                                                         | 9  | জলোচ্ছ্বাস Tidal surge                        |   |                                      |   |                                            |    |                                     |   |                 |    |                                         |   |                  |    |                        |   |                  |    |                                         |   |                                      |    |                    |
| 5                                                                                                                                                                                                       | ভূমিধস Landslide                                                                                                                                                                                                                                                                                                                                                                                                                                                                                                                                                                                                                                                                                                                                                                                       | 97 | অন্যান্য (উল্লেখ করুন) Others (specify)       |   |                                      |   |                                            |    |                                     |   |                 |    |                                         |   |                  |    |                        |   |                  |    |                                         |   |                                      |    |                    |

|                                                                                                                                                                                                        |                                                                                                                                                                                                                                                                                                                                                                                                                                                                                                                                                                                      |    |                                                              |   |                                                             |    |                                                                            |    |                                                                                                                                                              |    |                                                       |    |                                         |   |                |    |                        |   |                  |    |                                         |
|--------------------------------------------------------------------------------------------------------------------------------------------------------------------------------------------------------|--------------------------------------------------------------------------------------------------------------------------------------------------------------------------------------------------------------------------------------------------------------------------------------------------------------------------------------------------------------------------------------------------------------------------------------------------------------------------------------------------------------------------------------------------------------------------------------|----|--------------------------------------------------------------|---|-------------------------------------------------------------|----|----------------------------------------------------------------------------|----|--------------------------------------------------------------------------------------------------------------------------------------------------------------|----|-------------------------------------------------------|----|-----------------------------------------|---|----------------|----|------------------------|---|------------------|----|-----------------------------------------|
| অন্যান্য (উল্লেখ করুন)Others (Specify)                                                                                                                                                                 |                                                                                                                                                                                                                                                                                                                                                                                                                                                                                                                                                                                      |    |                                                              |   |                                                             |    |                                                                            |    |                                                                                                                                                              |    |                                                       |    |                                         |   |                |    |                        |   |                  |    |                                         |
| <p>গত ৫ বছরে ঘটে যাওয়া শেষ তিনটি প্রাকৃতিক দুর্যোগগুলো কি কি? ( সর্বশেষ ঘটনা)<br/>What was the third most recent disaster event you have experienced?</p>                                             | <table border="1"> <tr> <td>1</td> <td>বন্যা/আকস্মিক বন্যা Flood/Flash flood</td> <td>6</td> <td>ভারী বর্ষন/অতি বৃষ্টি Heavy rainfall</td> </tr> <tr> <td>2</td> <td>সাইক্লোন/বড় ধরনের ঝড় Cyclone</td> <td>7</td> <td>কালবৈশাখী Norwesters(Kalbaishakhi)</td> </tr> <tr> <td>3</td> <td>টর্নেডো Tornado</td> <td>8</td> <td>নদী ভাঙ্গন Riverbank erosion</td> </tr> <tr> <td>4</td> <td>সুনামি Tsunami</td> <td>9</td> <td>জলোচ্ছ্বাস Tidal surge</td> </tr> <tr> <td>5</td> <td>ভূমিধস Landslide</td> <td>97</td> <td>অন্যান্য (উল্লেখ করুন) Others (specify)</td> </tr> </table> | 1  | বন্যা/আকস্মিক বন্যা Flood/Flash flood                        | 6 | ভারী বর্ষন/অতি বৃষ্টি Heavy rainfall                        | 2  | সাইক্লোন/বড় ধরনের ঝড় Cyclone                                             | 7  | কালবৈশাখী Norwesters(Kalbaishakhi)                                                                                                                           | 3  | টর্নেডো Tornado                                       | 8  | নদী ভাঙ্গন Riverbank erosion            | 4 | সুনামি Tsunami | 9  | জলোচ্ছ্বাস Tidal surge | 5 | ভূমিধস Landslide | 97 | অন্যান্য (উল্লেখ করুন) Others (specify) |
| 1                                                                                                                                                                                                      | বন্যা/আকস্মিক বন্যা Flood/Flash flood                                                                                                                                                                                                                                                                                                                                                                                                                                                                                                                                                | 6  | ভারী বর্ষন/অতি বৃষ্টি Heavy rainfall                         |   |                                                             |    |                                                                            |    |                                                                                                                                                              |    |                                                       |    |                                         |   |                |    |                        |   |                  |    |                                         |
| 2                                                                                                                                                                                                      | সাইক্লোন/বড় ধরনের ঝড় Cyclone                                                                                                                                                                                                                                                                                                                                                                                                                                                                                                                                                       | 7  | কালবৈশাখী Norwesters(Kalbaishakhi)                           |   |                                                             |    |                                                                            |    |                                                                                                                                                              |    |                                                       |    |                                         |   |                |    |                        |   |                  |    |                                         |
| 3                                                                                                                                                                                                      | টর্নেডো Tornado                                                                                                                                                                                                                                                                                                                                                                                                                                                                                                                                                                      | 8  | নদী ভাঙ্গন Riverbank erosion                                 |   |                                                             |    |                                                                            |    |                                                                                                                                                              |    |                                                       |    |                                         |   |                |    |                        |   |                  |    |                                         |
| 4                                                                                                                                                                                                      | সুনামি Tsunami                                                                                                                                                                                                                                                                                                                                                                                                                                                                                                                                                                       | 9  | জলোচ্ছ্বাস Tidal surge                                       |   |                                                             |    |                                                                            |    |                                                                                                                                                              |    |                                                       |    |                                         |   |                |    |                        |   |                  |    |                                         |
| 5                                                                                                                                                                                                      | ভূমিধস Landslide                                                                                                                                                                                                                                                                                                                                                                                                                                                                                                                                                                     | 97 | অন্যান্য (উল্লেখ করুন) Others (specify)                      |   |                                                             |    |                                                                            |    |                                                                                                                                                              |    |                                                       |    |                                         |   |                |    |                        |   |                  |    |                                         |
| অন্যান্য (উল্লেখ করুন)Others (Specify)                                                                                                                                                                 |                                                                                                                                                                                                                                                                                                                                                                                                                                                                                                                                                                                      |    |                                                              |   |                                                             |    |                                                                            |    |                                                                                                                                                              |    |                                                       |    |                                         |   |                |    |                        |   |                  |    |                                         |
| <p>তখন আপনি কোন সতর্কবার্তা (দুর্যোগের সতর্কবার্তা) শুনেছিলেন কি?<br/>Did you receive any warning message for the most recent disaster you experienced?<br/>সতর্কবার্তা শুনেছিলেন</p>                  | <table border="1"> <tr> <td>1</td> <td>হ্যাঁ Yes</td> </tr> <tr> <td>2</td> <td>না No</td> </tr> <tr> <td>90</td> <td>মনে নেই Can't remember</td> </tr> </table>                                                                                                                                                                                                                                                                                                                                                                                                                     | 1  | হ্যাঁ Yes                                                    | 2 | না No                                                       | 90 | মনে নেই Can't remember                                                     |    |                                                                                                                                                              |    |                                                       |    |                                         |   |                |    |                        |   |                  |    |                                         |
| 1                                                                                                                                                                                                      | হ্যাঁ Yes                                                                                                                                                                                                                                                                                                                                                                                                                                                                                                                                                                            |    |                                                              |   |                                                             |    |                                                                            |    |                                                                                                                                                              |    |                                                       |    |                                         |   |                |    |                        |   |                  |    |                                         |
| 2                                                                                                                                                                                                      | না No                                                                                                                                                                                                                                                                                                                                                                                                                                                                                                                                                                                |    |                                                              |   |                                                             |    |                                                                            |    |                                                                                                                                                              |    |                                                       |    |                                         |   |                |    |                        |   |                  |    |                                         |
| 90                                                                                                                                                                                                     | মনে নেই Can't remember                                                                                                                                                                                                                                                                                                                                                                                                                                                                                                                                                               |    |                                                              |   |                                                             |    |                                                                            |    |                                                                                                                                                              |    |                                                       |    |                                         |   |                |    |                        |   |                  |    |                                         |
| <p>হ্যাঁ হলে, কোথায় থেকে দুর্যোগের সতর্কবার্তা শুনেছিলেন ?<br/>If yes, where did you get the message from?<br/>কোথা থেকে শুনেছিলেন</p>                                                                | <table border="1"> <tr> <td>1</td> <td>রেডিও Radio</td> </tr> <tr> <td>2</td> <td>টেলিভিশন Television</td> </tr> <tr> <td>3</td> <td>স্থানীয় প্রশাসনের প্রচারণা Announcement by local authority</td> </tr> <tr> <td>4</td> <td>স্বচ্ছসেবীদের প্রচারণা যেমন রেডক্রিসেন্ট/ফায়ার সার্ভিস ও সিভিল ডিফেন্স<br/>Announcement by the volunteers (Red crescent, fire service and civil defence etc)</td> </tr> <tr> <td>97</td> <td>অন্যান্য (উল্লেখ করুন) Others (specify)</td> </tr> </table>                                                                                            | 1  | রেডিও Radio                                                  | 2 | টেলিভিশন Television                                         | 3  | স্থানীয় প্রশাসনের প্রচারণা Announcement by local authority                | 4  | স্বচ্ছসেবীদের প্রচারণা যেমন রেডক্রিসেন্ট/ফায়ার সার্ভিস ও সিভিল ডিফেন্স<br>Announcement by the volunteers (Red crescent, fire service and civil defence etc) | 97 | অন্যান্য (উল্লেখ করুন) Others (specify)               |    |                                         |   |                |    |                        |   |                  |    |                                         |
| 1                                                                                                                                                                                                      | রেডিও Radio                                                                                                                                                                                                                                                                                                                                                                                                                                                                                                                                                                          |    |                                                              |   |                                                             |    |                                                                            |    |                                                                                                                                                              |    |                                                       |    |                                         |   |                |    |                        |   |                  |    |                                         |
| 2                                                                                                                                                                                                      | টেলিভিশন Television                                                                                                                                                                                                                                                                                                                                                                                                                                                                                                                                                                  |    |                                                              |   |                                                             |    |                                                                            |    |                                                                                                                                                              |    |                                                       |    |                                         |   |                |    |                        |   |                  |    |                                         |
| 3                                                                                                                                                                                                      | স্থানীয় প্রশাসনের প্রচারণা Announcement by local authority                                                                                                                                                                                                                                                                                                                                                                                                                                                                                                                          |    |                                                              |   |                                                             |    |                                                                            |    |                                                                                                                                                              |    |                                                       |    |                                         |   |                |    |                        |   |                  |    |                                         |
| 4                                                                                                                                                                                                      | স্বচ্ছসেবীদের প্রচারণা যেমন রেডক্রিসেন্ট/ফায়ার সার্ভিস ও সিভিল ডিফেন্স<br>Announcement by the volunteers (Red crescent, fire service and civil defence etc)                                                                                                                                                                                                                                                                                                                                                                                                                         |    |                                                              |   |                                                             |    |                                                                            |    |                                                                                                                                                              |    |                                                       |    |                                         |   |                |    |                        |   |                  |    |                                         |
| 97                                                                                                                                                                                                     | অন্যান্য (উল্লেখ করুন) Others (specify)                                                                                                                                                                                                                                                                                                                                                                                                                                                                                                                                              |    |                                                              |   |                                                             |    |                                                                            |    |                                                                                                                                                              |    |                                                       |    |                                         |   |                |    |                        |   |                  |    |                                         |
| অন্যান্য (উল্লেখ করুন)Others (Specify)                                                                                                                                                                 |                                                                                                                                                                                                                                                                                                                                                                                                                                                                                                                                                                                      |    |                                                              |   |                                                             |    |                                                                            |    |                                                                                                                                                              |    |                                                       |    |                                         |   |                |    |                        |   |                  |    |                                         |
| <p>দুর্যোগের সময় আপনারা কি কাছাকাছি কোন দুর্যোগ সেন্টারে আশ্রয় নিয়েছিলেন?<br/>During the last disaster did you and your household members move to a nearby shelter?<br/>কোথাও আশ্রয় নিয়েছিলেন</p> | <table border="1"> <tr> <td>1</td> <td>হ্যাঁ Yes</td> </tr> <tr> <td>2</td> <td>না No</td> </tr> </table>                                                                                                                                                                                                                                                                                                                                                                                                                                                                            | 1  | হ্যাঁ Yes                                                    | 2 | না No                                                       |    |                                                                            |    |                                                                                                                                                              |    |                                                       |    |                                         |   |                |    |                        |   |                  |    |                                         |
| 1                                                                                                                                                                                                      | হ্যাঁ Yes                                                                                                                                                                                                                                                                                                                                                                                                                                                                                                                                                                            |    |                                                              |   |                                                             |    |                                                                            |    |                                                                                                                                                              |    |                                                       |    |                                         |   |                |    |                        |   |                  |    |                                         |
| 2                                                                                                                                                                                                      | না No                                                                                                                                                                                                                                                                                                                                                                                                                                                                                                                                                                                |    |                                                              |   |                                                             |    |                                                                            |    |                                                                                                                                                              |    |                                                       |    |                                         |   |                |    |                        |   |                  |    |                                         |
| <p>হ্যাঁ হলে কে / কারা আশ্রয় কেন্দ্রের ব্যবস্থা করেছে?<br/>If yes, who put in place/organised the shelter?<br/>কারা ব্যবস্থা করেছে</p>                                                                | <table border="1"> <tr> <td>1</td> <td>নিজ উদ্যোগে গিয়েছি Self-initiative</td> <td>4</td> <td>এন জি ও NGO</td> </tr> <tr> <td>2</td> <td>সরকারী আশ্রয় কেন্দ্র Government Shelter</td> <td>97</td> <td>অন্যান্য (উল্লেখ করুন) Others (specify)</td> </tr> <tr> <td>3</td> <td>স্থানীয় প্রশাসন Local Administration</td> <td>99</td> <td>জানি না Don't know</td> </tr> <tr> <td></td> <td></td> <td>90</td> <td>মনে নেই Can't remember</td> </tr> </table>                                                                                                                          | 1  | নিজ উদ্যোগে গিয়েছি Self-initiative                          | 4 | এন জি ও NGO                                                 | 2  | সরকারী আশ্রয় কেন্দ্র Government Shelter                                   | 97 | অন্যান্য (উল্লেখ করুন) Others (specify)                                                                                                                      | 3  | স্থানীয় প্রশাসন Local Administration                 | 99 | জানি না Don't know                      |   |                | 90 | মনে নেই Can't remember |   |                  |    |                                         |
| 1                                                                                                                                                                                                      | নিজ উদ্যোগে গিয়েছি Self-initiative                                                                                                                                                                                                                                                                                                                                                                                                                                                                                                                                                  | 4  | এন জি ও NGO                                                  |   |                                                             |    |                                                                            |    |                                                                                                                                                              |    |                                                       |    |                                         |   |                |    |                        |   |                  |    |                                         |
| 2                                                                                                                                                                                                      | সরকারী আশ্রয় কেন্দ্র Government Shelter                                                                                                                                                                                                                                                                                                                                                                                                                                                                                                                                             | 97 | অন্যান্য (উল্লেখ করুন) Others (specify)                      |   |                                                             |    |                                                                            |    |                                                                                                                                                              |    |                                                       |    |                                         |   |                |    |                        |   |                  |    |                                         |
| 3                                                                                                                                                                                                      | স্থানীয় প্রশাসন Local Administration                                                                                                                                                                                                                                                                                                                                                                                                                                                                                                                                                | 99 | জানি না Don't know                                           |   |                                                             |    |                                                                            |    |                                                                                                                                                              |    |                                                       |    |                                         |   |                |    |                        |   |                  |    |                                         |
|                                                                                                                                                                                                        |                                                                                                                                                                                                                                                                                                                                                                                                                                                                                                                                                                                      | 90 | মনে নেই Can't remember                                       |   |                                                             |    |                                                                            |    |                                                                                                                                                              |    |                                                       |    |                                         |   |                |    |                        |   |                  |    |                                         |
| অন্যান্য (উল্লেখ করুন)Others (Specify)                                                                                                                                                                 |                                                                                                                                                                                                                                                                                                                                                                                                                                                                                                                                                                                      |    |                                                              |   |                                                             |    |                                                                            |    |                                                                                                                                                              |    |                                                       |    |                                         |   |                |    |                        |   |                  |    |                                         |
| <p>তখন আপনি কোথায় গিয়েছিলেন?<br/>What type of centre did you go to?<br/>কোথায় গিয়েছিলেন</p>                                                                                                        | <table border="1"> <tr> <td>1</td> <td>বন্যার্তদের জন্য সহায়তা কেন্দ্রে<sup>a</sup> Flood shelter</td> <td>4</td> <td>কমিউনিটি কেন্দ্রে Community centre</td> </tr> <tr> <td>2</td> <td>সাইক্লোন শেল্টারে Cyclone shelter</td> <td>5</td> <td>আত্মীয়র বাড়িতে Relatives homes</td> </tr> <tr> <td>3</td> <td>শিক্ষা প্রতিষ্ঠানে Educational institution</td> <td>99</td> <td>জানি না Don't know</td> </tr> </table>                                                                                                                                                                | 1  | বন্যার্তদের জন্য সহায়তা কেন্দ্রে <sup>a</sup> Flood shelter | 4 | কমিউনিটি কেন্দ্রে Community centre                          | 2  | সাইক্লোন শেল্টারে Cyclone shelter                                          | 5  | আত্মীয়র বাড়িতে Relatives homes                                                                                                                             | 3  | শিক্ষা প্রতিষ্ঠানে Educational institution            | 99 | জানি না Don't know                      |   |                |    |                        |   |                  |    |                                         |
| 1                                                                                                                                                                                                      | বন্যার্তদের জন্য সহায়তা কেন্দ্রে <sup>a</sup> Flood shelter                                                                                                                                                                                                                                                                                                                                                                                                                                                                                                                         | 4  | কমিউনিটি কেন্দ্রে Community centre                           |   |                                                             |    |                                                                            |    |                                                                                                                                                              |    |                                                       |    |                                         |   |                |    |                        |   |                  |    |                                         |
| 2                                                                                                                                                                                                      | সাইক্লোন শেল্টারে Cyclone shelter                                                                                                                                                                                                                                                                                                                                                                                                                                                                                                                                                    | 5  | আত্মীয়র বাড়িতে Relatives homes                             |   |                                                             |    |                                                                            |    |                                                                                                                                                              |    |                                                       |    |                                         |   |                |    |                        |   |                  |    |                                         |
| 3                                                                                                                                                                                                      | শিক্ষা প্রতিষ্ঠানে Educational institution                                                                                                                                                                                                                                                                                                                                                                                                                                                                                                                                           | 99 | জানি না Don't know                                           |   |                                                             |    |                                                                            |    |                                                                                                                                                              |    |                                                       |    |                                         |   |                |    |                        |   |                  |    |                                         |
| <p>প্রধানত কি কারণে আপনি আশ্রয় কেন্দ্রে যেতে পারেন নি ?<br/>What is the primary reason you did not go to the shelter/centre?<br/>কি কারণে যেতে পারেন নি</p>                                           | <table border="1"> <tr> <td>1</td> <td>প্রয়োজনে মনে করিনি Did not think it was needed</td> <td>4</td> <td>এ ধরনের দুর্যোগ প্রায়ই হয় Disaster is a common phenomenon</td> </tr> <tr> <td>2</td> <td>বাড়ীর জিনিস-পত্রের নিরাপত্তার কথা চিন্তা করে For the security of property</td> <td>5</td> <td>সাইক্লোন শেল্টার বেশ দুরে Shelter is far away</td> </tr> <tr> <td>3</td> <td>গবাদী পশু ফেলে রেখে যাইনি To protect household cattle</td> <td>97</td> <td>অন্যান্য (উল্লেখ করুন) Others (specify)</td> </tr> </table>                                                             | 1  | প্রয়োজনে মনে করিনি Did not think it was needed              | 4 | এ ধরনের দুর্যোগ প্রায়ই হয় Disaster is a common phenomenon | 2  | বাড়ীর জিনিস-পত্রের নিরাপত্তার কথা চিন্তা করে For the security of property | 5  | সাইক্লোন শেল্টার বেশ দুরে Shelter is far away                                                                                                                | 3  | গবাদী পশু ফেলে রেখে যাইনি To protect household cattle | 97 | অন্যান্য (উল্লেখ করুন) Others (specify) |   |                |    |                        |   |                  |    |                                         |
| 1                                                                                                                                                                                                      | প্রয়োজনে মনে করিনি Did not think it was needed                                                                                                                                                                                                                                                                                                                                                                                                                                                                                                                                      | 4  | এ ধরনের দুর্যোগ প্রায়ই হয় Disaster is a common phenomenon  |   |                                                             |    |                                                                            |    |                                                                                                                                                              |    |                                                       |    |                                         |   |                |    |                        |   |                  |    |                                         |
| 2                                                                                                                                                                                                      | বাড়ীর জিনিস-পত্রের নিরাপত্তার কথা চিন্তা করে For the security of property                                                                                                                                                                                                                                                                                                                                                                                                                                                                                                           | 5  | সাইক্লোন শেল্টার বেশ দুরে Shelter is far away                |   |                                                             |    |                                                                            |    |                                                                                                                                                              |    |                                                       |    |                                         |   |                |    |                        |   |                  |    |                                         |
| 3                                                                                                                                                                                                      | গবাদী পশু ফেলে রেখে যাইনি To protect household cattle                                                                                                                                                                                                                                                                                                                                                                                                                                                                                                                                | 97 | অন্যান্য (উল্লেখ করুন) Others (specify)                      |   |                                                             |    |                                                                            |    |                                                                                                                                                              |    |                                                       |    |                                         |   |                |    |                        |   |                  |    |                                         |

|                                                                                                                                                                                                                                                                                                                                                                                           |   |                                                      |    |                                                              |
|-------------------------------------------------------------------------------------------------------------------------------------------------------------------------------------------------------------------------------------------------------------------------------------------------------------------------------------------------------------------------------------------|---|------------------------------------------------------|----|--------------------------------------------------------------|
| অন্যান্য (উল্লেখ করুন) Others (Specify)                                                                                                                                                                                                                                                                                                                                                   |   |                                                      |    |                                                              |
| <p>এ এলাকায় সাধারণত যে ধরনের অসুখ-বিসুখ হয় সে তুলনায় পানিতে ডুবা প্রতিরোধে কাজ করাটা কতটা গুরুত্বপূর্ণ বলে মনে করেন?</p> <p>[একটি উত্তর দিতে পরামর্শ করুন ]<br/>Compared to other health problems you or your area face, how big a priority is it to reduce the risks associated with disasters that can lead to drowning? [Prompt for one response]<br/>গুরুত্বপূর্ণ বলে মনে করেন</p> | 1 | তেমন গুরুত্বপূর্ণ নয় Low priority                   |    |                                                              |
|                                                                                                                                                                                                                                                                                                                                                                                           | 2 | কিছুটা গুরুত্বপূর্ণ Medium priority                  |    |                                                              |
|                                                                                                                                                                                                                                                                                                                                                                                           | 3 | অতি গুরুত্বপূর্ণ High priority                       |    |                                                              |
| <p>উত্তর বলে দিবেন না, উত্তরদাতাকে সবচেয়ে বেশি ক্ষতি হয়েছে এমন তিনটি বিষয় নির্বাচন করুন Do not prompt, give the respondent time to think and mark up to 3 options)</p> <p>আপনার মতে এসকল প্রাকৃতিক দুর্যোগে কি ধরনের ক্ষতি সবচেয়ে বেশি হয়ে থাকে? What were the main effects of the most recent natural disaster you experienced?</p>                                                 | 1 | ইনজুরিজনিত অসুস্থতা Injury morbidity                 | 6  | আয় কমে যাওয়া Loss of income                                |
|                                                                                                                                                                                                                                                                                                                                                                                           | 2 | মৃত্যু Death                                         | 7  | গবাদী পশু হারিয়ে যায়/মারা যায় Loss of livestock           |
|                                                                                                                                                                                                                                                                                                                                                                                           | 3 | ঘর-বাড়ী ধসে পড়ে Damage to infrastructure           | 8  | ঋণ গ্রস্ত হয়ে যায় Debt                                     |
|                                                                                                                                                                                                                                                                                                                                                                                           | 4 | মূল্যবান সম্পদের ক্ষতি Loss of productive assets     | 9  | বিভিন্ন অসুখ-বিসুখ Disease                                   |
|                                                                                                                                                                                                                                                                                                                                                                                           | 5 | ফসলের ক্ষতি Loss of crops                            |    |                                                              |
| <p>আপনার মতে এসকল প্রাকৃতিক দুর্যোগে কি ধরনের ক্ষতি সবচেয়ে বেশি হয়ে থাকে? What were the main effects of the most recent natural disaster you experienced?</p>                                                                                                                                                                                                                           | 1 | ইনজুরিজনিত অসুস্থতা Injury morbidity                 | 6  | আয় কমে যাওয়া Loss of income                                |
|                                                                                                                                                                                                                                                                                                                                                                                           | 2 | মৃত্যু Death                                         | 7  | গবাদী পশু হারিয়ে যায়/মারা যায় Loss of livestock           |
|                                                                                                                                                                                                                                                                                                                                                                                           | 3 | ঘর-বাড়ী ধসে পড়ে Damage to infrastructure           | 8  | ঋণ গ্রস্ত হয়ে যায় Debt                                     |
|                                                                                                                                                                                                                                                                                                                                                                                           | 4 | মূল্যবান সম্পদের ক্ষতি Loss of productive assets     | 9  | বিভিন্ন অসুখ-বিসুখ Disease                                   |
|                                                                                                                                                                                                                                                                                                                                                                                           | 5 | ফসলের ক্ষতি Loss of crops                            |    |                                                              |
| <p>আপনার মতে এসকল প্রাকৃতিক দুর্যোগে কি ধরনের ক্ষতি সবচেয়ে বেশি হয়ে থাকে? What were the main effects of the most recent natural disaster you experienced?</p>                                                                                                                                                                                                                           | 1 | ইনজুরিজনিত অসুস্থতা Injury morbidity                 | 6  | আয় কমে যাওয়া Loss of income                                |
|                                                                                                                                                                                                                                                                                                                                                                                           | 2 | মৃত্যু Death                                         | 7  | গবাদী পশু হারিয়ে যায়/মারা যায় Loss of livestock           |
|                                                                                                                                                                                                                                                                                                                                                                                           | 3 | ঘর-বাড়ী ধসে পড়ে Damage to infrastructure           | 8  | ঋণ গ্রস্ত হয়ে যায় Debt                                     |
|                                                                                                                                                                                                                                                                                                                                                                                           | 4 | মূল্যবান সম্পদের ক্ষতি Loss of productive assets     | 9  | বিভিন্ন অসুখ-বিসুখ Disease                                   |
|                                                                                                                                                                                                                                                                                                                                                                                           | 5 | ফসলের ক্ষতি Loss of crops                            |    |                                                              |
| <p>এই প্রাকৃতিক দুর্যোগে আপনার এলাকায় অবকাঠামোগত/ পরিবেশগত কি ধরনের ক্ষতি সবচেয়ে বেশি হয়েছে?<br/>What parts of your community infrastructure or environment are most affected by this natural disaster?</p> <p>উত্তর বলে দিবেন না, উত্তরদাতাকে সবচেয়ে বেশি ক্ষতি হয়েছে এমন তিনটি বিষয় বলতে বলুন Do not prompt; select 3 most affected)<br/>অবকাঠামোগত ক্ষতি</p>                     | 1 | ঘর-বাড়ি Houses                                      | 7  | পানি ও পয়ঃনিষ্কাশন ব্যবস্থা Water and sanitation facilities |
|                                                                                                                                                                                                                                                                                                                                                                                           | 2 | কৃষি জমি/ফসল Farmland                                | 8  | রাস্তা- ঘাট Roads                                            |
|                                                                                                                                                                                                                                                                                                                                                                                           | 3 | মাছ ধরার সামগ্রী Fishing resources                   | 9  | ব্রীজ/কালভার্ট Bridges                                       |
|                                                                                                                                                                                                                                                                                                                                                                                           | 4 | গাছ-পালা/বাগান Trees/forests/orchards                | 99 | জানি না Don't know                                           |
|                                                                                                                                                                                                                                                                                                                                                                                           | 5 | বিদ্যালয়- Schools                                   | 97 | অন্যান্য (উল্লেখ করুন) Other                                 |
|                                                                                                                                                                                                                                                                                                                                                                                           | 6 | স্বাস্থ্য কেন্দ্র/ চিকিৎসা কেন্দ্র Health facilities |    |                                                              |
| অন্যান্য (উল্লেখ করুন)Others (Specify)                                                                                                                                                                                                                                                                                                                                                    |   |                                                      |    |                                                              |
| <p>এই প্রাকৃতিক দুর্যোগে আপনার এলাকার কোন ধরনের পেশাজীবীরা সবচেয়ে বেশি ক্ষতিগ্রস্ত?<br/>What kind of work or jobs in this area are most affected by this natural disaster?</p> <p>উত্তর বলে দিবেন না, উত্তরদাতার দেয়া প্রযোজ্য সব</p>                                                                                                                                                   | 1 | জেলে Fisherman                                       | 6  | ব্যবসায়ী Shopkeeper/businessman                             |
|                                                                                                                                                                                                                                                                                                                                                                                           | 2 | মাঝি Boatman                                         | 7  | সরকারী চাকরীজীবী Government employee                         |

|                                                                                                                                                                                                                                                                                                                                               |                                                                                                                                                                                                                                                                                                                                                                                                                                                                                                                                                                                                                                                                                                                                                                                                                                                                                                                                                                                                                                                                              |    |                                                |   |                                                |   |                                                               |    |                                               |   |                                  |    |                                  |   |                                                                     |    |                               |   |                                                     |    |                    |   |                                         |    |                                        |   |                                                                                             |  |  |   |                                                                                             |  |  |    |                                                               |  |  |    |                                        |  |  |  |
|-----------------------------------------------------------------------------------------------------------------------------------------------------------------------------------------------------------------------------------------------------------------------------------------------------------------------------------------------|------------------------------------------------------------------------------------------------------------------------------------------------------------------------------------------------------------------------------------------------------------------------------------------------------------------------------------------------------------------------------------------------------------------------------------------------------------------------------------------------------------------------------------------------------------------------------------------------------------------------------------------------------------------------------------------------------------------------------------------------------------------------------------------------------------------------------------------------------------------------------------------------------------------------------------------------------------------------------------------------------------------------------------------------------------------------------|----|------------------------------------------------|---|------------------------------------------------|---|---------------------------------------------------------------|----|-----------------------------------------------|---|----------------------------------|----|----------------------------------|---|---------------------------------------------------------------------|----|-------------------------------|---|-----------------------------------------------------|----|--------------------|---|-----------------------------------------|----|----------------------------------------|---|---------------------------------------------------------------------------------------------|--|--|---|---------------------------------------------------------------------------------------------|--|--|----|---------------------------------------------------------------|--|--|----|----------------------------------------|--|--|--|
| <p>কয়টি উত্তর নির্বাচন করুন<br/>( Do not prompt; select as many as apply)<br/>পেশাজীবীদের ক্ষতি</p>                                                                                                                                                                                                                                          | <table border="1"> <tr> <td>3</td> <td>রাখাল Livestock herder</td> <td>8</td> <td>পুলিশ/সামরিক বাহিনীর সদস্য<br/>Police/army</td> </tr> <tr> <td>4</td> <td>কৃষক Farmer</td> <td>99</td> <td>জানি না Don't know</td> </tr> <tr> <td>5</td> <td>দিন মজুর Wage labourer</td> <td>97</td> <td>অন্যান্য (উল্লেখ করুন) Other</td> </tr> </table>                                                                                                                                                                                                                                                                                                                                                                                                                                                                                                                                                                                                                                                                                                                                  | 3  | রাখাল Livestock herder                         | 8 | পুলিশ/সামরিক বাহিনীর সদস্য<br>Police/army      | 4 | কৃষক Farmer                                                   | 99 | জানি না Don't know                            | 5 | দিন মজুর Wage labourer           | 97 | অন্যান্য (উল্লেখ করুন) Other     |   |                                                                     |    |                               |   |                                                     |    |                    |   |                                         |    |                                        |   |                                                                                             |  |  |   |                                                                                             |  |  |    |                                                               |  |  |    |                                        |  |  |  |
| 3                                                                                                                                                                                                                                                                                                                                             | রাখাল Livestock herder                                                                                                                                                                                                                                                                                                                                                                                                                                                                                                                                                                                                                                                                                                                                                                                                                                                                                                                                                                                                                                                       | 8  | পুলিশ/সামরিক বাহিনীর সদস্য<br>Police/army      |   |                                                |   |                                                               |    |                                               |   |                                  |    |                                  |   |                                                                     |    |                               |   |                                                     |    |                    |   |                                         |    |                                        |   |                                                                                             |  |  |   |                                                                                             |  |  |    |                                                               |  |  |    |                                        |  |  |  |
| 4                                                                                                                                                                                                                                                                                                                                             | কৃষক Farmer                                                                                                                                                                                                                                                                                                                                                                                                                                                                                                                                                                                                                                                                                                                                                                                                                                                                                                                                                                                                                                                                  | 99 | জানি না Don't know                             |   |                                                |   |                                                               |    |                                               |   |                                  |    |                                  |   |                                                                     |    |                               |   |                                                     |    |                    |   |                                         |    |                                        |   |                                                                                             |  |  |   |                                                                                             |  |  |    |                                                               |  |  |    |                                        |  |  |  |
| 5                                                                                                                                                                                                                                                                                                                                             | দিন মজুর Wage labourer                                                                                                                                                                                                                                                                                                                                                                                                                                                                                                                                                                                                                                                                                                                                                                                                                                                                                                                                                                                                                                                       | 97 | অন্যান্য (উল্লেখ করুন) Other                   |   |                                                |   |                                                               |    |                                               |   |                                  |    |                                  |   |                                                                     |    |                               |   |                                                     |    |                    |   |                                         |    |                                        |   |                                                                                             |  |  |   |                                                                                             |  |  |    |                                                               |  |  |    |                                        |  |  |  |
| <p>অন্যান্য (উল্লেখ করুন)Others (Specify)</p>                                                                                                                                                                                                                                                                                                 |                                                                                                                                                                                                                                                                                                                                                                                                                                                                                                                                                                                                                                                                                                                                                                                                                                                                                                                                                                                                                                                                              |    |                                                |   |                                                |   |                                                               |    |                                               |   |                                  |    |                                  |   |                                                                     |    |                               |   |                                                     |    |                    |   |                                         |    |                                        |   |                                                                                             |  |  |   |                                                                                             |  |  |    |                                                               |  |  |    |                                        |  |  |  |
| <p>এই প্রাকৃতিক দুর্যোগে কোন ধরনের লোকজন বেশি ক্ষতিগ্রস্ত হয়েছে বলে মনে করেন?<br/>What groups of people do you think are most affected in your area during this natural disaster?<br/>প্রস্পট করা যাবে না ( যত বেশী সম্ভব উত্তর লিখুন)<br/>Do not prompt; select as many as apply<br/>লোকজনের ক্ষতি</p>                                      | <table border="1"> <tr> <td>1</td> <td>বৃদ্ধরা Older people</td> <td></td> <td></td> </tr> <tr> <td>2</td> <td>প্রাপ্তবয়স্ক ব্যক্তিরা Adults</td> <td></td> <td></td> </tr> <tr> <td>3</td> <td>শিশুরা Children</td> <td></td> <td></td> </tr> <tr> <td>4</td> <td>পুরুষ Men</td> <td></td> <td></td> </tr> <tr> <td>5</td> <td>মহিলা Women</td> <td></td> <td></td> </tr> <tr> <td>6</td> <td>প্রতিবন্ধীরা People with disabilities</td> <td></td> <td></td> </tr> <tr> <td>7</td> <td>দুঃস্থ ও গরীব লোকেরা Poorer people</td> <td></td> <td></td> </tr> <tr> <td>8</td> <td>নদী/সাগর তীরবর্তী লোকেরা People living in certain areas (e.g. river islands, coastal areas)</td> <td></td> <td></td> </tr> <tr> <td>99</td> <td>জানি না Don't know</td> <td></td> <td></td> </tr> <tr> <td>97</td> <td>অন্যান্য (উল্লেখ করুন) Other (specify)</td> <td></td> <td></td> </tr> </table>                                                                                                                                                                                         | 1  | বৃদ্ধরা Older people                           |   |                                                | 2 | প্রাপ্তবয়স্ক ব্যক্তিরা Adults                                |    |                                               | 3 | শিশুরা Children                  |    |                                  | 4 | পুরুষ Men                                                           |    |                               | 5 | মহিলা Women                                         |    |                    | 6 | প্রতিবন্ধীরা People with disabilities   |    |                                        | 7 | দুঃস্থ ও গরীব লোকেরা Poorer people                                                          |  |  | 8 | নদী/সাগর তীরবর্তী লোকেরা People living in certain areas (e.g. river islands, coastal areas) |  |  | 99 | জানি না Don't know                                            |  |  | 97 | অন্যান্য (উল্লেখ করুন) Other (specify) |  |  |  |
| 1                                                                                                                                                                                                                                                                                                                                             | বৃদ্ধরা Older people                                                                                                                                                                                                                                                                                                                                                                                                                                                                                                                                                                                                                                                                                                                                                                                                                                                                                                                                                                                                                                                         |    |                                                |   |                                                |   |                                                               |    |                                               |   |                                  |    |                                  |   |                                                                     |    |                               |   |                                                     |    |                    |   |                                         |    |                                        |   |                                                                                             |  |  |   |                                                                                             |  |  |    |                                                               |  |  |    |                                        |  |  |  |
| 2                                                                                                                                                                                                                                                                                                                                             | প্রাপ্তবয়স্ক ব্যক্তিরা Adults                                                                                                                                                                                                                                                                                                                                                                                                                                                                                                                                                                                                                                                                                                                                                                                                                                                                                                                                                                                                                                               |    |                                                |   |                                                |   |                                                               |    |                                               |   |                                  |    |                                  |   |                                                                     |    |                               |   |                                                     |    |                    |   |                                         |    |                                        |   |                                                                                             |  |  |   |                                                                                             |  |  |    |                                                               |  |  |    |                                        |  |  |  |
| 3                                                                                                                                                                                                                                                                                                                                             | শিশুরা Children                                                                                                                                                                                                                                                                                                                                                                                                                                                                                                                                                                                                                                                                                                                                                                                                                                                                                                                                                                                                                                                              |    |                                                |   |                                                |   |                                                               |    |                                               |   |                                  |    |                                  |   |                                                                     |    |                               |   |                                                     |    |                    |   |                                         |    |                                        |   |                                                                                             |  |  |   |                                                                                             |  |  |    |                                                               |  |  |    |                                        |  |  |  |
| 4                                                                                                                                                                                                                                                                                                                                             | পুরুষ Men                                                                                                                                                                                                                                                                                                                                                                                                                                                                                                                                                                                                                                                                                                                                                                                                                                                                                                                                                                                                                                                                    |    |                                                |   |                                                |   |                                                               |    |                                               |   |                                  |    |                                  |   |                                                                     |    |                               |   |                                                     |    |                    |   |                                         |    |                                        |   |                                                                                             |  |  |   |                                                                                             |  |  |    |                                                               |  |  |    |                                        |  |  |  |
| 5                                                                                                                                                                                                                                                                                                                                             | মহিলা Women                                                                                                                                                                                                                                                                                                                                                                                                                                                                                                                                                                                                                                                                                                                                                                                                                                                                                                                                                                                                                                                                  |    |                                                |   |                                                |   |                                                               |    |                                               |   |                                  |    |                                  |   |                                                                     |    |                               |   |                                                     |    |                    |   |                                         |    |                                        |   |                                                                                             |  |  |   |                                                                                             |  |  |    |                                                               |  |  |    |                                        |  |  |  |
| 6                                                                                                                                                                                                                                                                                                                                             | প্রতিবন্ধীরা People with disabilities                                                                                                                                                                                                                                                                                                                                                                                                                                                                                                                                                                                                                                                                                                                                                                                                                                                                                                                                                                                                                                        |    |                                                |   |                                                |   |                                                               |    |                                               |   |                                  |    |                                  |   |                                                                     |    |                               |   |                                                     |    |                    |   |                                         |    |                                        |   |                                                                                             |  |  |   |                                                                                             |  |  |    |                                                               |  |  |    |                                        |  |  |  |
| 7                                                                                                                                                                                                                                                                                                                                             | দুঃস্থ ও গরীব লোকেরা Poorer people                                                                                                                                                                                                                                                                                                                                                                                                                                                                                                                                                                                                                                                                                                                                                                                                                                                                                                                                                                                                                                           |    |                                                |   |                                                |   |                                                               |    |                                               |   |                                  |    |                                  |   |                                                                     |    |                               |   |                                                     |    |                    |   |                                         |    |                                        |   |                                                                                             |  |  |   |                                                                                             |  |  |    |                                                               |  |  |    |                                        |  |  |  |
| 8                                                                                                                                                                                                                                                                                                                                             | নদী/সাগর তীরবর্তী লোকেরা People living in certain areas (e.g. river islands, coastal areas)                                                                                                                                                                                                                                                                                                                                                                                                                                                                                                                                                                                                                                                                                                                                                                                                                                                                                                                                                                                  |    |                                                |   |                                                |   |                                                               |    |                                               |   |                                  |    |                                  |   |                                                                     |    |                               |   |                                                     |    |                    |   |                                         |    |                                        |   |                                                                                             |  |  |   |                                                                                             |  |  |    |                                                               |  |  |    |                                        |  |  |  |
| 99                                                                                                                                                                                                                                                                                                                                            | জানি না Don't know                                                                                                                                                                                                                                                                                                                                                                                                                                                                                                                                                                                                                                                                                                                                                                                                                                                                                                                                                                                                                                                           |    |                                                |   |                                                |   |                                                               |    |                                               |   |                                  |    |                                  |   |                                                                     |    |                               |   |                                                     |    |                    |   |                                         |    |                                        |   |                                                                                             |  |  |   |                                                                                             |  |  |    |                                                               |  |  |    |                                        |  |  |  |
| 97                                                                                                                                                                                                                                                                                                                                            | অন্যান্য (উল্লেখ করুন) Other (specify)                                                                                                                                                                                                                                                                                                                                                                                                                                                                                                                                                                                                                                                                                                                                                                                                                                                                                                                                                                                                                                       |    |                                                |   |                                                |   |                                                               |    |                                               |   |                                  |    |                                  |   |                                                                     |    |                               |   |                                                     |    |                    |   |                                         |    |                                        |   |                                                                                             |  |  |   |                                                                                             |  |  |    |                                                               |  |  |    |                                        |  |  |  |
| <p>অন্যান্য (উল্লেখ করুন) Others (Specify)</p>                                                                                                                                                                                                                                                                                                |                                                                                                                                                                                                                                                                                                                                                                                                                                                                                                                                                                                                                                                                                                                                                                                                                                                                                                                                                                                                                                                                              |    |                                                |   |                                                |   |                                                               |    |                                               |   |                                  |    |                                  |   |                                                                     |    |                               |   |                                                     |    |                    |   |                                         |    |                                        |   |                                                                                             |  |  |   |                                                                                             |  |  |    |                                                               |  |  |    |                                        |  |  |  |
| <p>প্রাকৃতিক দুর্যোগের সময় আপনি মূলত কোন বিষয়গুলো নিয়ে বেশি চিন্তিত থাকেন?<br/>In the event of a natural disaster, what are your main concerns?<br/><br/>(উত্তর দিতে পরামর্শ করুন, শীর্ষ ৩টি উত্তর চিহ্নিত করুন<br/>Mark top 3 choices, prompt for responses)<br/>চিন্তিত বিষয়গুলো</p>                                                    | <table border="1"> <tr> <td>1</td> <td>ব্যক্তিগত নিরাপত্তা নিয়ে Personal safety</td> <td></td> <td></td> </tr> <tr> <td>2</td> <td>খানার/পরিবারের সদস্যদের মৃত্যু নিয়ে Death of a family member</td> <td></td> <td></td> </tr> <tr> <td>3</td> <td>বাড়ী-ঘর নিয়ে Losing your house</td> <td></td> <td></td> </tr> <tr> <td>4</td> <td>বাড়ী-ঘরের জিনিসপত্র নিয়ে Losing your belongings</td> <td></td> <td></td> </tr> <tr> <td>5</td> <td>কাজ/চাকুরি হারানো নিয়ে Losing your work</td> <td></td> <td></td> </tr> <tr> <td>6</td> <td>ফসল নষ্ট হওয়া নিয়ে Crop failure</td> <td></td> <td></td> </tr> <tr> <td>7</td> <td>খানার/পরিবারের সদস্যদের সাথে না থাকতে পারা নিয়ে Not being able to get in touch with family</td> <td></td> <td></td> </tr> <tr> <td>8</td> <td>পানিতে ভেসে যাওয়া নিয়ে Being overwhelmed</td> <td></td> <td></td> </tr> <tr> <td>9</td> <td>কোন বিষয়ে উদ্বিগ্ন/চিন্তিত ছিলাম না I would not be concerned</td> <td></td> <td></td> </tr> <tr> <td>97</td> <td>অন্যান্য (উল্লেখ করুন) Other (specify)</td> <td></td> <td></td> </tr> </table> | 1  | ব্যক্তিগত নিরাপত্তা নিয়ে Personal safety      |   |                                                | 2 | খানার/পরিবারের সদস্যদের মৃত্যু নিয়ে Death of a family member |    |                                               | 3 | বাড়ী-ঘর নিয়ে Losing your house |    |                                  | 4 | বাড়ী-ঘরের জিনিসপত্র নিয়ে Losing your belongings                   |    |                               | 5 | কাজ/চাকুরি হারানো নিয়ে Losing your work            |    |                    | 6 | ফসল নষ্ট হওয়া নিয়ে Crop failure       |    |                                        | 7 | খানার/পরিবারের সদস্যদের সাথে না থাকতে পারা নিয়ে Not being able to get in touch with family |  |  | 8 | পানিতে ভেসে যাওয়া নিয়ে Being overwhelmed                                                  |  |  | 9  | কোন বিষয়ে উদ্বিগ্ন/চিন্তিত ছিলাম না I would not be concerned |  |  | 97 | অন্যান্য (উল্লেখ করুন) Other (specify) |  |  |  |
| 1                                                                                                                                                                                                                                                                                                                                             | ব্যক্তিগত নিরাপত্তা নিয়ে Personal safety                                                                                                                                                                                                                                                                                                                                                                                                                                                                                                                                                                                                                                                                                                                                                                                                                                                                                                                                                                                                                                    |    |                                                |   |                                                |   |                                                               |    |                                               |   |                                  |    |                                  |   |                                                                     |    |                               |   |                                                     |    |                    |   |                                         |    |                                        |   |                                                                                             |  |  |   |                                                                                             |  |  |    |                                                               |  |  |    |                                        |  |  |  |
| 2                                                                                                                                                                                                                                                                                                                                             | খানার/পরিবারের সদস্যদের মৃত্যু নিয়ে Death of a family member                                                                                                                                                                                                                                                                                                                                                                                                                                                                                                                                                                                                                                                                                                                                                                                                                                                                                                                                                                                                                |    |                                                |   |                                                |   |                                                               |    |                                               |   |                                  |    |                                  |   |                                                                     |    |                               |   |                                                     |    |                    |   |                                         |    |                                        |   |                                                                                             |  |  |   |                                                                                             |  |  |    |                                                               |  |  |    |                                        |  |  |  |
| 3                                                                                                                                                                                                                                                                                                                                             | বাড়ী-ঘর নিয়ে Losing your house                                                                                                                                                                                                                                                                                                                                                                                                                                                                                                                                                                                                                                                                                                                                                                                                                                                                                                                                                                                                                                             |    |                                                |   |                                                |   |                                                               |    |                                               |   |                                  |    |                                  |   |                                                                     |    |                               |   |                                                     |    |                    |   |                                         |    |                                        |   |                                                                                             |  |  |   |                                                                                             |  |  |    |                                                               |  |  |    |                                        |  |  |  |
| 4                                                                                                                                                                                                                                                                                                                                             | বাড়ী-ঘরের জিনিসপত্র নিয়ে Losing your belongings                                                                                                                                                                                                                                                                                                                                                                                                                                                                                                                                                                                                                                                                                                                                                                                                                                                                                                                                                                                                                            |    |                                                |   |                                                |   |                                                               |    |                                               |   |                                  |    |                                  |   |                                                                     |    |                               |   |                                                     |    |                    |   |                                         |    |                                        |   |                                                                                             |  |  |   |                                                                                             |  |  |    |                                                               |  |  |    |                                        |  |  |  |
| 5                                                                                                                                                                                                                                                                                                                                             | কাজ/চাকুরি হারানো নিয়ে Losing your work                                                                                                                                                                                                                                                                                                                                                                                                                                                                                                                                                                                                                                                                                                                                                                                                                                                                                                                                                                                                                                     |    |                                                |   |                                                |   |                                                               |    |                                               |   |                                  |    |                                  |   |                                                                     |    |                               |   |                                                     |    |                    |   |                                         |    |                                        |   |                                                                                             |  |  |   |                                                                                             |  |  |    |                                                               |  |  |    |                                        |  |  |  |
| 6                                                                                                                                                                                                                                                                                                                                             | ফসল নষ্ট হওয়া নিয়ে Crop failure                                                                                                                                                                                                                                                                                                                                                                                                                                                                                                                                                                                                                                                                                                                                                                                                                                                                                                                                                                                                                                            |    |                                                |   |                                                |   |                                                               |    |                                               |   |                                  |    |                                  |   |                                                                     |    |                               |   |                                                     |    |                    |   |                                         |    |                                        |   |                                                                                             |  |  |   |                                                                                             |  |  |    |                                                               |  |  |    |                                        |  |  |  |
| 7                                                                                                                                                                                                                                                                                                                                             | খানার/পরিবারের সদস্যদের সাথে না থাকতে পারা নিয়ে Not being able to get in touch with family                                                                                                                                                                                                                                                                                                                                                                                                                                                                                                                                                                                                                                                                                                                                                                                                                                                                                                                                                                                  |    |                                                |   |                                                |   |                                                               |    |                                               |   |                                  |    |                                  |   |                                                                     |    |                               |   |                                                     |    |                    |   |                                         |    |                                        |   |                                                                                             |  |  |   |                                                                                             |  |  |    |                                                               |  |  |    |                                        |  |  |  |
| 8                                                                                                                                                                                                                                                                                                                                             | পানিতে ভেসে যাওয়া নিয়ে Being overwhelmed                                                                                                                                                                                                                                                                                                                                                                                                                                                                                                                                                                                                                                                                                                                                                                                                                                                                                                                                                                                                                                   |    |                                                |   |                                                |   |                                                               |    |                                               |   |                                  |    |                                  |   |                                                                     |    |                               |   |                                                     |    |                    |   |                                         |    |                                        |   |                                                                                             |  |  |   |                                                                                             |  |  |    |                                                               |  |  |    |                                        |  |  |  |
| 9                                                                                                                                                                                                                                                                                                                                             | কোন বিষয়ে উদ্বিগ্ন/চিন্তিত ছিলাম না I would not be concerned                                                                                                                                                                                                                                                                                                                                                                                                                                                                                                                                                                                                                                                                                                                                                                                                                                                                                                                                                                                                                |    |                                                |   |                                                |   |                                                               |    |                                               |   |                                  |    |                                  |   |                                                                     |    |                               |   |                                                     |    |                    |   |                                         |    |                                        |   |                                                                                             |  |  |   |                                                                                             |  |  |    |                                                               |  |  |    |                                        |  |  |  |
| 97                                                                                                                                                                                                                                                                                                                                            | অন্যান্য (উল্লেখ করুন) Other (specify)                                                                                                                                                                                                                                                                                                                                                                                                                                                                                                                                                                                                                                                                                                                                                                                                                                                                                                                                                                                                                                       |    |                                                |   |                                                |   |                                                               |    |                                               |   |                                  |    |                                  |   |                                                                     |    |                               |   |                                                     |    |                    |   |                                         |    |                                        |   |                                                                                             |  |  |   |                                                                                             |  |  |    |                                                               |  |  |    |                                        |  |  |  |
| <p>অন্যান্য (উল্লেখ করুন)Others (Specify)</p>                                                                                                                                                                                                                                                                                                 |                                                                                                                                                                                                                                                                                                                                                                                                                                                                                                                                                                                                                                                                                                                                                                                                                                                                                                                                                                                                                                                                              |    |                                                |   |                                                |   |                                                               |    |                                               |   |                                  |    |                                  |   |                                                                     |    |                               |   |                                                     |    |                    |   |                                         |    |                                        |   |                                                                                             |  |  |   |                                                                                             |  |  |    |                                                               |  |  |    |                                        |  |  |  |
| <p>এই প্রাকৃতিক দুর্যোগের বিষয়ে আপনি কোথা থেকে প্রয়োজনীয় তথ্য বা পূর্বাভাস পেয়ে থাকেন?<br/>In the event of a natural disaster where do you get forecasts or information from?<br/><br/>(উত্তর বলে দিবেন না, উত্তরদাতার দেয়া প্রযোজ্য সব কয়টি উত্তর নির্বাচন করুন; Do not prompt, select all that apply)<br/>কোথা থেকে পূর্বাভাস পান</p> | <table border="1"> <tr> <td>1</td> <td>রেডিও Radio</td> <td>7</td> <td>অন্য কোন সরকারী প্রতিষ্ঠান<br/>Other government</td> </tr> <tr> <td>2</td> <td>টেলিভিশন TV</td> <td>8</td> <td>এলার্ম/ সাইরেন/মাইক Alarm, siren, loudspeaker</td> </tr> <tr> <td>3</td> <td>সংবাদপত্র/পত্রিকা Print media</td> <td>9</td> <td>মোবাইল/ম্যাসেজ<br/>Cellphone/Text</td> </tr> <tr> <td>4</td> <td>বন্ধু-বান্ধবী/পরিবারের সদস্য/প্রতিবেশী<br/>Friends, family, neighbor</td> <td>10</td> <td>কোথাও থেকে পাইনি From nowhere</td> </tr> <tr> <td>5</td> <td>গ্রাম পুলিশ/ গ্রাম পঞ্চায়েত Village administration</td> <td>99</td> <td>জানি না Don't know</td> </tr> <tr> <td>6</td> <td>পুলিশ/ সামরিক বাহিনীর সদস্য Army/police</td> <td>97</td> <td>অন্যান্য (উল্লেখ করুন) Other (specify)</td> </tr> </table>                                                                                                                                                                                                                                                                              | 1  | রেডিও Radio                                    | 7 | অন্য কোন সরকারী প্রতিষ্ঠান<br>Other government | 2 | টেলিভিশন TV                                                   | 8  | এলার্ম/ সাইরেন/মাইক Alarm, siren, loudspeaker | 3 | সংবাদপত্র/পত্রিকা Print media    | 9  | মোবাইল/ম্যাসেজ<br>Cellphone/Text | 4 | বন্ধু-বান্ধবী/পরিবারের সদস্য/প্রতিবেশী<br>Friends, family, neighbor | 10 | কোথাও থেকে পাইনি From nowhere | 5 | গ্রাম পুলিশ/ গ্রাম পঞ্চায়েত Village administration | 99 | জানি না Don't know | 6 | পুলিশ/ সামরিক বাহিনীর সদস্য Army/police | 97 | অন্যান্য (উল্লেখ করুন) Other (specify) |   |                                                                                             |  |  |   |                                                                                             |  |  |    |                                                               |  |  |    |                                        |  |  |  |
| 1                                                                                                                                                                                                                                                                                                                                             | রেডিও Radio                                                                                                                                                                                                                                                                                                                                                                                                                                                                                                                                                                                                                                                                                                                                                                                                                                                                                                                                                                                                                                                                  | 7  | অন্য কোন সরকারী প্রতিষ্ঠান<br>Other government |   |                                                |   |                                                               |    |                                               |   |                                  |    |                                  |   |                                                                     |    |                               |   |                                                     |    |                    |   |                                         |    |                                        |   |                                                                                             |  |  |   |                                                                                             |  |  |    |                                                               |  |  |    |                                        |  |  |  |
| 2                                                                                                                                                                                                                                                                                                                                             | টেলিভিশন TV                                                                                                                                                                                                                                                                                                                                                                                                                                                                                                                                                                                                                                                                                                                                                                                                                                                                                                                                                                                                                                                                  | 8  | এলার্ম/ সাইরেন/মাইক Alarm, siren, loudspeaker  |   |                                                |   |                                                               |    |                                               |   |                                  |    |                                  |   |                                                                     |    |                               |   |                                                     |    |                    |   |                                         |    |                                        |   |                                                                                             |  |  |   |                                                                                             |  |  |    |                                                               |  |  |    |                                        |  |  |  |
| 3                                                                                                                                                                                                                                                                                                                                             | সংবাদপত্র/পত্রিকা Print media                                                                                                                                                                                                                                                                                                                                                                                                                                                                                                                                                                                                                                                                                                                                                                                                                                                                                                                                                                                                                                                | 9  | মোবাইল/ম্যাসেজ<br>Cellphone/Text               |   |                                                |   |                                                               |    |                                               |   |                                  |    |                                  |   |                                                                     |    |                               |   |                                                     |    |                    |   |                                         |    |                                        |   |                                                                                             |  |  |   |                                                                                             |  |  |    |                                                               |  |  |    |                                        |  |  |  |
| 4                                                                                                                                                                                                                                                                                                                                             | বন্ধু-বান্ধবী/পরিবারের সদস্য/প্রতিবেশী<br>Friends, family, neighbor                                                                                                                                                                                                                                                                                                                                                                                                                                                                                                                                                                                                                                                                                                                                                                                                                                                                                                                                                                                                          | 10 | কোথাও থেকে পাইনি From nowhere                  |   |                                                |   |                                                               |    |                                               |   |                                  |    |                                  |   |                                                                     |    |                               |   |                                                     |    |                    |   |                                         |    |                                        |   |                                                                                             |  |  |   |                                                                                             |  |  |    |                                                               |  |  |    |                                        |  |  |  |
| 5                                                                                                                                                                                                                                                                                                                                             | গ্রাম পুলিশ/ গ্রাম পঞ্চায়েত Village administration                                                                                                                                                                                                                                                                                                                                                                                                                                                                                                                                                                                                                                                                                                                                                                                                                                                                                                                                                                                                                          | 99 | জানি না Don't know                             |   |                                                |   |                                                               |    |                                               |   |                                  |    |                                  |   |                                                                     |    |                               |   |                                                     |    |                    |   |                                         |    |                                        |   |                                                                                             |  |  |   |                                                                                             |  |  |    |                                                               |  |  |    |                                        |  |  |  |
| 6                                                                                                                                                                                                                                                                                                                                             | পুলিশ/ সামরিক বাহিনীর সদস্য Army/police                                                                                                                                                                                                                                                                                                                                                                                                                                                                                                                                                                                                                                                                                                                                                                                                                                                                                                                                                                                                                                      | 97 | অন্যান্য (উল্লেখ করুন) Other (specify)         |   |                                                |   |                                                               |    |                                               |   |                                  |    |                                  |   |                                                                     |    |                               |   |                                                     |    |                    |   |                                         |    |                                        |   |                                                                                             |  |  |   |                                                                                             |  |  |    |                                                               |  |  |    |                                        |  |  |  |
| <p>অন্যান্য (উল্লেখ করুন)Others (Specify)</p>                                                                                                                                                                                                                                                                                                 |                                                                                                                                                                                                                                                                                                                                                                                                                                                                                                                                                                                                                                                                                                                                                                                                                                                                                                                                                                                                                                                                              |    |                                                |   |                                                |   |                                                               |    |                                               |   |                                  |    |                                  |   |                                                                     |    |                               |   |                                                     |    |                    |   |                                         |    |                                        |   |                                                                                             |  |  |   |                                                                                             |  |  |    |                                                               |  |  |    |                                        |  |  |  |
| <p>প্রাকৃতিক দুর্যোগকালীন জরুরী সতর্কবার্তা প্রচারের জন্য আপনার কাছে ব্যক্তি/প্রতিষ্ঠানের মধ্যে কোনটি বেশী কার্যকর মনে হয়?<br/>In the event of a natural disaster, what person or organisation is your preferred source of</p>                                                                                                               | <table border="1"> <tr> <td>1</td> <td>পুলিশ Police</td> <td></td> <td></td> </tr> <tr> <td>2</td> <td>ফায়ার সার্ভিস Fire services</td> <td></td> <td></td> </tr> <tr> <td>3</td> <td>স্থানীয় এনজিও Local NGOs</td> <td></td> <td></td> </tr> </table>                                                                                                                                                                                                                                                                                                                                                                                                                                                                                                                                                                                                                                                                                                                                                                                                                     | 1  | পুলিশ Police                                   |   |                                                | 2 | ফায়ার সার্ভিস Fire services                                  |    |                                               | 3 | স্থানীয় এনজিও Local NGOs        |    |                                  |   |                                                                     |    |                               |   |                                                     |    |                    |   |                                         |    |                                        |   |                                                                                             |  |  |   |                                                                                             |  |  |    |                                                               |  |  |    |                                        |  |  |  |
| 1                                                                                                                                                                                                                                                                                                                                             | পুলিশ Police                                                                                                                                                                                                                                                                                                                                                                                                                                                                                                                                                                                                                                                                                                                                                                                                                                                                                                                                                                                                                                                                 |    |                                                |   |                                                |   |                                                               |    |                                               |   |                                  |    |                                  |   |                                                                     |    |                               |   |                                                     |    |                    |   |                                         |    |                                        |   |                                                                                             |  |  |   |                                                                                             |  |  |    |                                                               |  |  |    |                                        |  |  |  |
| 2                                                                                                                                                                                                                                                                                                                                             | ফায়ার সার্ভিস Fire services                                                                                                                                                                                                                                                                                                                                                                                                                                                                                                                                                                                                                                                                                                                                                                                                                                                                                                                                                                                                                                                 |    |                                                |   |                                                |   |                                                               |    |                                               |   |                                  |    |                                  |   |                                                                     |    |                               |   |                                                     |    |                    |   |                                         |    |                                        |   |                                                                                             |  |  |   |                                                                                             |  |  |    |                                                               |  |  |    |                                        |  |  |  |
| 3                                                                                                                                                                                                                                                                                                                                             | স্থানীয় এনজিও Local NGOs                                                                                                                                                                                                                                                                                                                                                                                                                                                                                                                                                                                                                                                                                                                                                                                                                                                                                                                                                                                                                                                    |    |                                                |   |                                                |   |                                                               |    |                                               |   |                                  |    |                                  |   |                                                                     |    |                               |   |                                                     |    |                    |   |                                         |    |                                        |   |                                                                                             |  |  |   |                                                                                             |  |  |    |                                                               |  |  |    |                                        |  |  |  |

|                                                                                                                                                                                                                                                                                                                                                       |                                                                                                                                                                                                                                                                                                                                                                                                                                                                                                                                                                                                                                                                                                                                                                |   |                                 |   |                                                              |   |                                                                              |   |                                                          |   |                                                                                                                                                                                             |    |                                                                              |   |                                                                                         |   |                                                                                                                  |   |                                         |    |                                        |    |                                        |
|-------------------------------------------------------------------------------------------------------------------------------------------------------------------------------------------------------------------------------------------------------------------------------------------------------------------------------------------------------|----------------------------------------------------------------------------------------------------------------------------------------------------------------------------------------------------------------------------------------------------------------------------------------------------------------------------------------------------------------------------------------------------------------------------------------------------------------------------------------------------------------------------------------------------------------------------------------------------------------------------------------------------------------------------------------------------------------------------------------------------------------|---|---------------------------------|---|--------------------------------------------------------------|---|------------------------------------------------------------------------------|---|----------------------------------------------------------|---|---------------------------------------------------------------------------------------------------------------------------------------------------------------------------------------------|----|------------------------------------------------------------------------------|---|-----------------------------------------------------------------------------------------|---|------------------------------------------------------------------------------------------------------------------|---|-----------------------------------------|----|----------------------------------------|----|----------------------------------------|
| <p>information?</p> <p>(শীর্ষ ৩টি উত্তর চিহ্নিত করুন) (Mark top 3 choices)<br/>ব্যক্তি/প্রতিষ্ঠানের মধ্যে বেশী কার্যকর</p>                                                                                                                                                                                                                            | <table border="1"> <tr><td>4</td><td>স্কুল/কলেজ School/Colleges</td></tr> <tr><td>5</td><td>মসজিদ/মাদ্রাসা Mosque/Temple</td></tr> <tr><td>6</td><td>গণ্যমান্য ব্যক্তি Community leader</td></tr> <tr><td>7</td><td>স্থানীয় জনস্বাস্থ্য প্রতিষ্ঠান Public Health Department</td></tr> <tr><td>8</td><td>স্থানীয় সরকারী/বেসরকারী প্রতিষ্ঠান/ ক্লিনিক/সাইক্লোন সেন্টারের মাঠকর্মী<br/>Clinic/Outreach worker Government agencies, Cyclone preparedness programme, Local disaster management committee</td></tr> <tr><td>97</td><td>অন্যান্য (উল্লেখ করুন) Other (specify)</td></tr> </table>                                                                                                                                                                   | 4 | স্কুল/কলেজ School/Colleges      | 5 | মসজিদ/মাদ্রাসা Mosque/Temple                                 | 6 | গণ্যমান্য ব্যক্তি Community leader                                           | 7 | স্থানীয় জনস্বাস্থ্য প্রতিষ্ঠান Public Health Department | 8 | স্থানীয় সরকারী/বেসরকারী প্রতিষ্ঠান/ ক্লিনিক/সাইক্লোন সেন্টারের মাঠকর্মী<br>Clinic/Outreach worker Government agencies, Cyclone preparedness programme, Local disaster management committee | 97 | অন্যান্য (উল্লেখ করুন) Other (specify)                                       |   |                                                                                         |   |                                                                                                                  |   |                                         |    |                                        |    |                                        |
| 4                                                                                                                                                                                                                                                                                                                                                     | স্কুল/কলেজ School/Colleges                                                                                                                                                                                                                                                                                                                                                                                                                                                                                                                                                                                                                                                                                                                                     |   |                                 |   |                                                              |   |                                                                              |   |                                                          |   |                                                                                                                                                                                             |    |                                                                              |   |                                                                                         |   |                                                                                                                  |   |                                         |    |                                        |    |                                        |
| 5                                                                                                                                                                                                                                                                                                                                                     | মসজিদ/মাদ্রাসা Mosque/Temple                                                                                                                                                                                                                                                                                                                                                                                                                                                                                                                                                                                                                                                                                                                                   |   |                                 |   |                                                              |   |                                                                              |   |                                                          |   |                                                                                                                                                                                             |    |                                                                              |   |                                                                                         |   |                                                                                                                  |   |                                         |    |                                        |    |                                        |
| 6                                                                                                                                                                                                                                                                                                                                                     | গণ্যমান্য ব্যক্তি Community leader                                                                                                                                                                                                                                                                                                                                                                                                                                                                                                                                                                                                                                                                                                                             |   |                                 |   |                                                              |   |                                                                              |   |                                                          |   |                                                                                                                                                                                             |    |                                                                              |   |                                                                                         |   |                                                                                                                  |   |                                         |    |                                        |    |                                        |
| 7                                                                                                                                                                                                                                                                                                                                                     | স্থানীয় জনস্বাস্থ্য প্রতিষ্ঠান Public Health Department                                                                                                                                                                                                                                                                                                                                                                                                                                                                                                                                                                                                                                                                                                       |   |                                 |   |                                                              |   |                                                                              |   |                                                          |   |                                                                                                                                                                                             |    |                                                                              |   |                                                                                         |   |                                                                                                                  |   |                                         |    |                                        |    |                                        |
| 8                                                                                                                                                                                                                                                                                                                                                     | স্থানীয় সরকারী/বেসরকারী প্রতিষ্ঠান/ ক্লিনিক/সাইক্লোন সেন্টারের মাঠকর্মী<br>Clinic/Outreach worker Government agencies, Cyclone preparedness programme, Local disaster management committee                                                                                                                                                                                                                                                                                                                                                                                                                                                                                                                                                                    |   |                                 |   |                                                              |   |                                                                              |   |                                                          |   |                                                                                                                                                                                             |    |                                                                              |   |                                                                                         |   |                                                                                                                  |   |                                         |    |                                        |    |                                        |
| 97                                                                                                                                                                                                                                                                                                                                                    | অন্যান্য (উল্লেখ করুন) Other (specify)                                                                                                                                                                                                                                                                                                                                                                                                                                                                                                                                                                                                                                                                                                                         |   |                                 |   |                                                              |   |                                                                              |   |                                                          |   |                                                                                                                                                                                             |    |                                                                              |   |                                                                                         |   |                                                                                                                  |   |                                         |    |                                        |    |                                        |
| <p>অন্যান্য (উল্লেখ করুন)Others (Specify)</p>                                                                                                                                                                                                                                                                                                         |                                                                                                                                                                                                                                                                                                                                                                                                                                                                                                                                                                                                                                                                                                                                                                |   |                                 |   |                                                              |   |                                                                              |   |                                                          |   |                                                                                                                                                                                             |    |                                                                              |   |                                                                                         |   |                                                                                                                  |   |                                         |    |                                        |    |                                        |
| <p>প্রাকৃতিক দুর্যোগকালীন জরুরী সতর্কবার্তা প্রচারের জন্য আপনার কাছে কোন পদ্ধতি বেশী কার্যকর বলে মনে হয়?</p> <p>In the event of a natural disaster, what is your preferred method of receiving emergency alert information?</p> <p>(শীর্ষ ৩টি উত্তর চিহ্নিত করুন)<br/>(Mark top 3 choices)<br/>জরুরী সতর্কবার্তা প্রচারে কোন পদ্ধতি বেশী কার্যকর</p> | <table border="1"> <tr><td>1</td><td>টেলিভিশন Television</td></tr> <tr><td>2</td><td>রেডিও Radio</td></tr> <tr><td>3</td><td>সংবাদপত্র/পত্রিকা Print Media</td></tr> <tr><td>4</td><td>বন্ধু-বান্ধবী/ পরিবারের সদস্য Friends/Family</td></tr> <tr><td>5</td><td>প্রতিবেশী Neighbors</td></tr> <tr><td>6</td><td>স্থানীয় দুর্যোগ ব্যবস্থাপনা কমিটি Local level disaster management committee</td></tr> <tr><td>7</td><td>স্থানীয় এনজিও Local NGOs</td></tr> <tr><td>8</td><td>স্বচ্ছাসেবী প্রতিষ্ঠান যেমন- রেড ক্রিসেন্ট সোসাইটি, স্কাউট-Voluntary organizations: Red Crescent society, Scouts</td></tr> <tr><td>9</td><td>মোবাইল/ম্যাসেজ Cell phones/text alerts</td></tr> <tr><td>97</td><td>অন্যান্য (উল্লেখ করুন) Other (specify)</td></tr> </table>      | 1 | টেলিভিশন Television             | 2 | রেডিও Radio                                                  | 3 | সংবাদপত্র/পত্রিকা Print Media                                                | 4 | বন্ধু-বান্ধবী/ পরিবারের সদস্য Friends/Family             | 5 | প্রতিবেশী Neighbors                                                                                                                                                                         | 6  | স্থানীয় দুর্যোগ ব্যবস্থাপনা কমিটি Local level disaster management committee | 7 | স্থানীয় এনজিও Local NGOs                                                               | 8 | স্বচ্ছাসেবী প্রতিষ্ঠান যেমন- রেড ক্রিসেন্ট সোসাইটি, স্কাউট-Voluntary organizations: Red Crescent society, Scouts | 9 | মোবাইল/ম্যাসেজ Cell phones/text alerts  | 97 | অন্যান্য (উল্লেখ করুন) Other (specify) |    |                                        |
| 1                                                                                                                                                                                                                                                                                                                                                     | টেলিভিশন Television                                                                                                                                                                                                                                                                                                                                                                                                                                                                                                                                                                                                                                                                                                                                            |   |                                 |   |                                                              |   |                                                                              |   |                                                          |   |                                                                                                                                                                                             |    |                                                                              |   |                                                                                         |   |                                                                                                                  |   |                                         |    |                                        |    |                                        |
| 2                                                                                                                                                                                                                                                                                                                                                     | রেডিও Radio                                                                                                                                                                                                                                                                                                                                                                                                                                                                                                                                                                                                                                                                                                                                                    |   |                                 |   |                                                              |   |                                                                              |   |                                                          |   |                                                                                                                                                                                             |    |                                                                              |   |                                                                                         |   |                                                                                                                  |   |                                         |    |                                        |    |                                        |
| 3                                                                                                                                                                                                                                                                                                                                                     | সংবাদপত্র/পত্রিকা Print Media                                                                                                                                                                                                                                                                                                                                                                                                                                                                                                                                                                                                                                                                                                                                  |   |                                 |   |                                                              |   |                                                                              |   |                                                          |   |                                                                                                                                                                                             |    |                                                                              |   |                                                                                         |   |                                                                                                                  |   |                                         |    |                                        |    |                                        |
| 4                                                                                                                                                                                                                                                                                                                                                     | বন্ধু-বান্ধবী/ পরিবারের সদস্য Friends/Family                                                                                                                                                                                                                                                                                                                                                                                                                                                                                                                                                                                                                                                                                                                   |   |                                 |   |                                                              |   |                                                                              |   |                                                          |   |                                                                                                                                                                                             |    |                                                                              |   |                                                                                         |   |                                                                                                                  |   |                                         |    |                                        |    |                                        |
| 5                                                                                                                                                                                                                                                                                                                                                     | প্রতিবেশী Neighbors                                                                                                                                                                                                                                                                                                                                                                                                                                                                                                                                                                                                                                                                                                                                            |   |                                 |   |                                                              |   |                                                                              |   |                                                          |   |                                                                                                                                                                                             |    |                                                                              |   |                                                                                         |   |                                                                                                                  |   |                                         |    |                                        |    |                                        |
| 6                                                                                                                                                                                                                                                                                                                                                     | স্থানীয় দুর্যোগ ব্যবস্থাপনা কমিটি Local level disaster management committee                                                                                                                                                                                                                                                                                                                                                                                                                                                                                                                                                                                                                                                                                   |   |                                 |   |                                                              |   |                                                                              |   |                                                          |   |                                                                                                                                                                                             |    |                                                                              |   |                                                                                         |   |                                                                                                                  |   |                                         |    |                                        |    |                                        |
| 7                                                                                                                                                                                                                                                                                                                                                     | স্থানীয় এনজিও Local NGOs                                                                                                                                                                                                                                                                                                                                                                                                                                                                                                                                                                                                                                                                                                                                      |   |                                 |   |                                                              |   |                                                                              |   |                                                          |   |                                                                                                                                                                                             |    |                                                                              |   |                                                                                         |   |                                                                                                                  |   |                                         |    |                                        |    |                                        |
| 8                                                                                                                                                                                                                                                                                                                                                     | স্বচ্ছাসেবী প্রতিষ্ঠান যেমন- রেড ক্রিসেন্ট সোসাইটি, স্কাউট-Voluntary organizations: Red Crescent society, Scouts                                                                                                                                                                                                                                                                                                                                                                                                                                                                                                                                                                                                                                               |   |                                 |   |                                                              |   |                                                                              |   |                                                          |   |                                                                                                                                                                                             |    |                                                                              |   |                                                                                         |   |                                                                                                                  |   |                                         |    |                                        |    |                                        |
| 9                                                                                                                                                                                                                                                                                                                                                     | মোবাইল/ম্যাসেজ Cell phones/text alerts                                                                                                                                                                                                                                                                                                                                                                                                                                                                                                                                                                                                                                                                                                                         |   |                                 |   |                                                              |   |                                                                              |   |                                                          |   |                                                                                                                                                                                             |    |                                                                              |   |                                                                                         |   |                                                                                                                  |   |                                         |    |                                        |    |                                        |
| 97                                                                                                                                                                                                                                                                                                                                                    | অন্যান্য (উল্লেখ করুন) Other (specify)                                                                                                                                                                                                                                                                                                                                                                                                                                                                                                                                                                                                                                                                                                                         |   |                                 |   |                                                              |   |                                                                              |   |                                                          |   |                                                                                                                                                                                             |    |                                                                              |   |                                                                                         |   |                                                                                                                  |   |                                         |    |                                        |    |                                        |
| <p>অন্যান্য (উল্লেখ করুন)Others (Specify)</p>                                                                                                                                                                                                                                                                                                         |                                                                                                                                                                                                                                                                                                                                                                                                                                                                                                                                                                                                                                                                                                                                                                |   |                                 |   |                                                              |   |                                                                              |   |                                                          |   |                                                                                                                                                                                             |    |                                                                              |   |                                                                                         |   |                                                                                                                  |   |                                         |    |                                        |    |                                        |
| <p>প্রাকৃতিক দুর্যোগকালীন কিভাবে ঘর-বাড়ী, নিজেকে এবং পরিবারের সদস্যদের নিরাপদ রাখতে হবে সে বিষয়ে কখনো কোন তথ্য পেয়েছেন কি?)</p> <p>Have you ever received any information on how to keep your household/members safe during a natural disasters?<br/>নিরাপদ রাখতে তথ্য পেয়েছেন কি</p>                                                             | <table border="1"> <tr><td>1</td><td>হ্যাঁ Yes</td></tr> <tr><td>2</td><td>না No</td></tr> </table>                                                                                                                                                                                                                                                                                                                                                                                                                                                                                                                                                                                                                                                            | 1 | হ্যাঁ Yes                       | 2 | না No                                                        |   |                                                                              |   |                                                          |   |                                                                                                                                                                                             |    |                                                                              |   |                                                                                         |   |                                                                                                                  |   |                                         |    |                                        |    |                                        |
| 1                                                                                                                                                                                                                                                                                                                                                     | হ্যাঁ Yes                                                                                                                                                                                                                                                                                                                                                                                                                                                                                                                                                                                                                                                                                                                                                      |   |                                 |   |                                                              |   |                                                                              |   |                                                          |   |                                                                                                                                                                                             |    |                                                                              |   |                                                                                         |   |                                                                                                                  |   |                                         |    |                                        |    |                                        |
| 2                                                                                                                                                                                                                                                                                                                                                     | না No                                                                                                                                                                                                                                                                                                                                                                                                                                                                                                                                                                                                                                                                                                                                                          |   |                                 |   |                                                              |   |                                                                              |   |                                                          |   |                                                                                                                                                                                             |    |                                                                              |   |                                                                                         |   |                                                                                                                  |   |                                         |    |                                        |    |                                        |
| <p>হ্যাঁ হলে, কোথায় থেকে এই তথ্য পেয়েছেন?</p> <p>If yes, from where did you receive this information from?</p> <p>(শীর্ষ ৩টি উত্তর চিহ্নিত করুন)<br/>(Mark top 3 choices)<br/>কোথায় তথ্য পেয়েছেন</p>                                                                                                                                              | <table border="1"> <tr><td>1</td><td>টেলিভিশন Television</td></tr> <tr><td>2</td><td>রেডিও Radio</td></tr> <tr><td>3</td><td>সংবাদপত্র/পত্রিকা Newspaper</td></tr> <tr><td>4</td><td>গনমাধ্যম ( লিফলেট ইত্যাদি) Print Media (pamphlet/flyer)</td></tr> <tr><td>5</td><td>বন্ধু-বান্ধবী/ পরিবারের সদস্য Friends/Family</td></tr> <tr><td>6</td><td>প্রতিবেশী Neighbors</td></tr> <tr><td>7</td><td>গণ্যমান্য ব্যক্তি/ধর্মীয় নেতা (ইমাম/পুরোহিত/ঠাকুর) Community leaders/Religious leaders</td></tr> <tr><td>8</td><td>মাঠকর্মী Outreach worker</td></tr> <tr><td>9</td><td>স্বাস্থ্যকর্মী Community health workers</td></tr> <tr><td>10</td><td>এনজিও কর্মী NGO workers</td></tr> <tr><td>97</td><td>অন্যান্য (উল্লেখ করুন) Other (Specify)</td></tr> </table> | 1 | টেলিভিশন Television             | 2 | রেডিও Radio                                                  | 3 | সংবাদপত্র/পত্রিকা Newspaper                                                  | 4 | গনমাধ্যম ( লিফলেট ইত্যাদি) Print Media (pamphlet/flyer)  | 5 | বন্ধু-বান্ধবী/ পরিবারের সদস্য Friends/Family                                                                                                                                                | 6  | প্রতিবেশী Neighbors                                                          | 7 | গণ্যমান্য ব্যক্তি/ধর্মীয় নেতা (ইমাম/পুরোহিত/ঠাকুর) Community leaders/Religious leaders | 8 | মাঠকর্মী Outreach worker                                                                                         | 9 | স্বাস্থ্যকর্মী Community health workers | 10 | এনজিও কর্মী NGO workers                | 97 | অন্যান্য (উল্লেখ করুন) Other (Specify) |
| 1                                                                                                                                                                                                                                                                                                                                                     | টেলিভিশন Television                                                                                                                                                                                                                                                                                                                                                                                                                                                                                                                                                                                                                                                                                                                                            |   |                                 |   |                                                              |   |                                                                              |   |                                                          |   |                                                                                                                                                                                             |    |                                                                              |   |                                                                                         |   |                                                                                                                  |   |                                         |    |                                        |    |                                        |
| 2                                                                                                                                                                                                                                                                                                                                                     | রেডিও Radio                                                                                                                                                                                                                                                                                                                                                                                                                                                                                                                                                                                                                                                                                                                                                    |   |                                 |   |                                                              |   |                                                                              |   |                                                          |   |                                                                                                                                                                                             |    |                                                                              |   |                                                                                         |   |                                                                                                                  |   |                                         |    |                                        |    |                                        |
| 3                                                                                                                                                                                                                                                                                                                                                     | সংবাদপত্র/পত্রিকা Newspaper                                                                                                                                                                                                                                                                                                                                                                                                                                                                                                                                                                                                                                                                                                                                    |   |                                 |   |                                                              |   |                                                                              |   |                                                          |   |                                                                                                                                                                                             |    |                                                                              |   |                                                                                         |   |                                                                                                                  |   |                                         |    |                                        |    |                                        |
| 4                                                                                                                                                                                                                                                                                                                                                     | গনমাধ্যম ( লিফলেট ইত্যাদি) Print Media (pamphlet/flyer)                                                                                                                                                                                                                                                                                                                                                                                                                                                                                                                                                                                                                                                                                                        |   |                                 |   |                                                              |   |                                                                              |   |                                                          |   |                                                                                                                                                                                             |    |                                                                              |   |                                                                                         |   |                                                                                                                  |   |                                         |    |                                        |    |                                        |
| 5                                                                                                                                                                                                                                                                                                                                                     | বন্ধু-বান্ধবী/ পরিবারের সদস্য Friends/Family                                                                                                                                                                                                                                                                                                                                                                                                                                                                                                                                                                                                                                                                                                                   |   |                                 |   |                                                              |   |                                                                              |   |                                                          |   |                                                                                                                                                                                             |    |                                                                              |   |                                                                                         |   |                                                                                                                  |   |                                         |    |                                        |    |                                        |
| 6                                                                                                                                                                                                                                                                                                                                                     | প্রতিবেশী Neighbors                                                                                                                                                                                                                                                                                                                                                                                                                                                                                                                                                                                                                                                                                                                                            |   |                                 |   |                                                              |   |                                                                              |   |                                                          |   |                                                                                                                                                                                             |    |                                                                              |   |                                                                                         |   |                                                                                                                  |   |                                         |    |                                        |    |                                        |
| 7                                                                                                                                                                                                                                                                                                                                                     | গণ্যমান্য ব্যক্তি/ধর্মীয় নেতা (ইমাম/পুরোহিত/ঠাকুর) Community leaders/Religious leaders                                                                                                                                                                                                                                                                                                                                                                                                                                                                                                                                                                                                                                                                        |   |                                 |   |                                                              |   |                                                                              |   |                                                          |   |                                                                                                                                                                                             |    |                                                                              |   |                                                                                         |   |                                                                                                                  |   |                                         |    |                                        |    |                                        |
| 8                                                                                                                                                                                                                                                                                                                                                     | মাঠকর্মী Outreach worker                                                                                                                                                                                                                                                                                                                                                                                                                                                                                                                                                                                                                                                                                                                                       |   |                                 |   |                                                              |   |                                                                              |   |                                                          |   |                                                                                                                                                                                             |    |                                                                              |   |                                                                                         |   |                                                                                                                  |   |                                         |    |                                        |    |                                        |
| 9                                                                                                                                                                                                                                                                                                                                                     | স্বাস্থ্যকর্মী Community health workers                                                                                                                                                                                                                                                                                                                                                                                                                                                                                                                                                                                                                                                                                                                        |   |                                 |   |                                                              |   |                                                                              |   |                                                          |   |                                                                                                                                                                                             |    |                                                                              |   |                                                                                         |   |                                                                                                                  |   |                                         |    |                                        |    |                                        |
| 10                                                                                                                                                                                                                                                                                                                                                    | এনজিও কর্মী NGO workers                                                                                                                                                                                                                                                                                                                                                                                                                                                                                                                                                                                                                                                                                                                                        |   |                                 |   |                                                              |   |                                                                              |   |                                                          |   |                                                                                                                                                                                             |    |                                                                              |   |                                                                                         |   |                                                                                                                  |   |                                         |    |                                        |    |                                        |
| 97                                                                                                                                                                                                                                                                                                                                                    | অন্যান্য (উল্লেখ করুন) Other (Specify)                                                                                                                                                                                                                                                                                                                                                                                                                                                                                                                                                                                                                                                                                                                         |   |                                 |   |                                                              |   |                                                                              |   |                                                          |   |                                                                                                                                                                                             |    |                                                                              |   |                                                                                         |   |                                                                                                                  |   |                                         |    |                                        |    |                                        |
| <p>অন্যান্য (উল্লেখ করুন)Others (Specify)</p>                                                                                                                                                                                                                                                                                                         |                                                                                                                                                                                                                                                                                                                                                                                                                                                                                                                                                                                                                                                                                                                                                                |   |                                 |   |                                                              |   |                                                                              |   |                                                          |   |                                                                                                                                                                                             |    |                                                                              |   |                                                                                         |   |                                                                                                                  |   |                                         |    |                                        |    |                                        |
| <p>আপনার মতে, সংকটকালীন সময় সেবা ও তথ্য পাবার সম্ভাব্য বাধা/সমস্যাগুলো কি?</p> <p>What do you believe are potential barriers/problems to accessing emergencies services and information?</p>                                                                                                                                                         | <table border="1"> <tr><td>1</td><td>তথ্যের অভাব Lack of information</td></tr> <tr><td>2</td><td>করণীয় সম্পর্কে জ্ঞানের অভাব Lack of knowledge of what to do</td></tr> <tr><td>3</td><td>বর্তমান অবস্থান সম্পর্কে জ্ঞান না থাকা Lack of knowledge of current location</td></tr> </table>                                                                                                                                                                                                                                                                                                                                                                                                                                                                      | 1 | তথ্যের অভাব Lack of information | 2 | করণীয় সম্পর্কে জ্ঞানের অভাব Lack of knowledge of what to do | 3 | বর্তমান অবস্থান সম্পর্কে জ্ঞান না থাকা Lack of knowledge of current location |   |                                                          |   |                                                                                                                                                                                             |    |                                                                              |   |                                                                                         |   |                                                                                                                  |   |                                         |    |                                        |    |                                        |
| 1                                                                                                                                                                                                                                                                                                                                                     | তথ্যের অভাব Lack of information                                                                                                                                                                                                                                                                                                                                                                                                                                                                                                                                                                                                                                                                                                                                |   |                                 |   |                                                              |   |                                                                              |   |                                                          |   |                                                                                                                                                                                             |    |                                                                              |   |                                                                                         |   |                                                                                                                  |   |                                         |    |                                        |    |                                        |
| 2                                                                                                                                                                                                                                                                                                                                                     | করণীয় সম্পর্কে জ্ঞানের অভাব Lack of knowledge of what to do                                                                                                                                                                                                                                                                                                                                                                                                                                                                                                                                                                                                                                                                                                   |   |                                 |   |                                                              |   |                                                                              |   |                                                          |   |                                                                                                                                                                                             |    |                                                                              |   |                                                                                         |   |                                                                                                                  |   |                                         |    |                                        |    |                                        |
| 3                                                                                                                                                                                                                                                                                                                                                     | বর্তমান অবস্থান সম্পর্কে জ্ঞান না থাকা Lack of knowledge of current location                                                                                                                                                                                                                                                                                                                                                                                                                                                                                                                                                                                                                                                                                   |   |                                 |   |                                                              |   |                                                                              |   |                                                          |   |                                                                                                                                                                                             |    |                                                                              |   |                                                                                         |   |                                                                                                                  |   |                                         |    |                                        |    |                                        |

|                                                                                                                                                                                                                                                                                                                                                                     |                                                                                                                                                                                                                                                                                                                                                                                                                                                                                                                                                                                                                                                                                                                                                                                                                                                                                                                                                                                                                    |   |                                                                                                                                                                                |   |                                                                                                                                                                                  |   |                                                                                                                                   |   |                                                                                                                                |    |                                                                                      |   |                                                                                      |    |                                                         |   |                                                                                      |   |                 |    |                     |    |                                        |
|---------------------------------------------------------------------------------------------------------------------------------------------------------------------------------------------------------------------------------------------------------------------------------------------------------------------------------------------------------------------|--------------------------------------------------------------------------------------------------------------------------------------------------------------------------------------------------------------------------------------------------------------------------------------------------------------------------------------------------------------------------------------------------------------------------------------------------------------------------------------------------------------------------------------------------------------------------------------------------------------------------------------------------------------------------------------------------------------------------------------------------------------------------------------------------------------------------------------------------------------------------------------------------------------------------------------------------------------------------------------------------------------------|---|--------------------------------------------------------------------------------------------------------------------------------------------------------------------------------|---|----------------------------------------------------------------------------------------------------------------------------------------------------------------------------------|---|-----------------------------------------------------------------------------------------------------------------------------------|---|--------------------------------------------------------------------------------------------------------------------------------|----|--------------------------------------------------------------------------------------|---|--------------------------------------------------------------------------------------|----|---------------------------------------------------------|---|--------------------------------------------------------------------------------------|---|-----------------|----|---------------------|----|----------------------------------------|
| <p>(উত্তরদাতা যে কয়টি বলবে, সবক'টি বৃত্তায়িত করুন<br/>Select all that apply)<br/>সম্ভাব্য বাধা/সমস্যাগুলো কি</p>                                                                                                                                                                                                                                                  | <table border="1"> <tr> <td>4</td> <td>প্রাকৃতিক দুর্যোগের অবস্থান সম্পর্কে তথ্য না জানা এবং সম্ভাব্য গতিপথ সম্পর্কে ধারণা না থাকা Lack of knowledge where the natural disaster is located and/or where it is heading</td> </tr> <tr> <td>5</td> <td>যানবাহনের অভাব Lack of transportation</td> </tr> <tr> <td>6</td> <td>সম্পত্তির নিরাপত্তা Property security</td> </tr> <tr> <td>7</td> <td>ব্যক্তিগত নিরাপত্তা Personal safety</td> </tr> <tr> <td>97</td> <td>অন্যান্য (উল্লেখ করুন) Other (specify)</td> </tr> </table>                                                                                                                                                                                                                                                                                                                                                                                                                                                                                      | 4 | প্রাকৃতিক দুর্যোগের অবস্থান সম্পর্কে তথ্য না জানা এবং সম্ভাব্য গতিপথ সম্পর্কে ধারণা না থাকা Lack of knowledge where the natural disaster is located and/or where it is heading | 5 | যানবাহনের অভাব Lack of transportation                                                                                                                                            | 6 | সম্পত্তির নিরাপত্তা Property security                                                                                             | 7 | ব্যক্তিগত নিরাপত্তা Personal safety                                                                                            | 97 | অন্যান্য (উল্লেখ করুন) Other (specify)                                               |   |                                                                                      |    |                                                         |   |                                                                                      |   |                 |    |                     |    |                                        |
| 4                                                                                                                                                                                                                                                                                                                                                                   | প্রাকৃতিক দুর্যোগের অবস্থান সম্পর্কে তথ্য না জানা এবং সম্ভাব্য গতিপথ সম্পর্কে ধারণা না থাকা Lack of knowledge where the natural disaster is located and/or where it is heading                                                                                                                                                                                                                                                                                                                                                                                                                                                                                                                                                                                                                                                                                                                                                                                                                                     |   |                                                                                                                                                                                |   |                                                                                                                                                                                  |   |                                                                                                                                   |   |                                                                                                                                |    |                                                                                      |   |                                                                                      |    |                                                         |   |                                                                                      |   |                 |    |                     |    |                                        |
| 5                                                                                                                                                                                                                                                                                                                                                                   | যানবাহনের অভাব Lack of transportation                                                                                                                                                                                                                                                                                                                                                                                                                                                                                                                                                                                                                                                                                                                                                                                                                                                                                                                                                                              |   |                                                                                                                                                                                |   |                                                                                                                                                                                  |   |                                                                                                                                   |   |                                                                                                                                |    |                                                                                      |   |                                                                                      |    |                                                         |   |                                                                                      |   |                 |    |                     |    |                                        |
| 6                                                                                                                                                                                                                                                                                                                                                                   | সম্পত্তির নিরাপত্তা Property security                                                                                                                                                                                                                                                                                                                                                                                                                                                                                                                                                                                                                                                                                                                                                                                                                                                                                                                                                                              |   |                                                                                                                                                                                |   |                                                                                                                                                                                  |   |                                                                                                                                   |   |                                                                                                                                |    |                                                                                      |   |                                                                                      |    |                                                         |   |                                                                                      |   |                 |    |                     |    |                                        |
| 7                                                                                                                                                                                                                                                                                                                                                                   | ব্যক্তিগত নিরাপত্তা Personal safety                                                                                                                                                                                                                                                                                                                                                                                                                                                                                                                                                                                                                                                                                                                                                                                                                                                                                                                                                                                |   |                                                                                                                                                                                |   |                                                                                                                                                                                  |   |                                                                                                                                   |   |                                                                                                                                |    |                                                                                      |   |                                                                                      |    |                                                         |   |                                                                                      |   |                 |    |                     |    |                                        |
| 97                                                                                                                                                                                                                                                                                                                                                                  | অন্যান্য (উল্লেখ করুন) Other (specify)                                                                                                                                                                                                                                                                                                                                                                                                                                                                                                                                                                                                                                                                                                                                                                                                                                                                                                                                                                             |   |                                                                                                                                                                                |   |                                                                                                                                                                                  |   |                                                                                                                                   |   |                                                                                                                                |    |                                                                                      |   |                                                                                      |    |                                                         |   |                                                                                      |   |                 |    |                     |    |                                        |
| <p>অন্যান্য (উল্লেখ করুন)Others (Specify)</p>                                                                                                                                                                                                                                                                                                                       |                                                                                                                                                                                                                                                                                                                                                                                                                                                                                                                                                                                                                                                                                                                                                                                                                                                                                                                                                                                                                    |   |                                                                                                                                                                                |   |                                                                                                                                                                                  |   |                                                                                                                                   |   |                                                                                                                                |    |                                                                                      |   |                                                                                      |    |                                                         |   |                                                                                      |   |                 |    |                     |    |                                        |
| <p>আপনি কি মনে করেন আপনার বাড়ী একটি প্রাকৃতিক দুর্যোগ মোকা বেলায় প্রস্তুত কি না?<br/>Do you feel your household is well prepared to handle a natural disaster?<br/>দুর্যোগ মোকাবেলায় প্রস্তুত</p>                                                                                                                                                                | <table border="1"> <tr> <td>1</td> <td>হ্যাঁ<br/>Yes</td> </tr> <tr> <td>2</td> <td>না No</td> </tr> </table>                                                                                                                                                                                                                                                                                                                                                                                                                                                                                                                                                                                                                                                                                                                                                                                                                                                                                                      | 1 | হ্যাঁ<br>Yes                                                                                                                                                                   | 2 | না No                                                                                                                                                                            |   |                                                                                                                                   |   |                                                                                                                                |    |                                                                                      |   |                                                                                      |    |                                                         |   |                                                                                      |   |                 |    |                     |    |                                        |
| 1                                                                                                                                                                                                                                                                                                                                                                   | হ্যাঁ<br>Yes                                                                                                                                                                                                                                                                                                                                                                                                                                                                                                                                                                                                                                                                                                                                                                                                                                                                                                                                                                                                       |   |                                                                                                                                                                                |   |                                                                                                                                                                                  |   |                                                                                                                                   |   |                                                                                                                                |    |                                                                                      |   |                                                                                      |    |                                                         |   |                                                                                      |   |                 |    |                     |    |                                        |
| 2                                                                                                                                                                                                                                                                                                                                                                   | না No                                                                                                                                                                                                                                                                                                                                                                                                                                                                                                                                                                                                                                                                                                                                                                                                                                                                                                                                                                                                              |   |                                                                                                                                                                                |   |                                                                                                                                                                                  |   |                                                                                                                                   |   |                                                                                                                                |    |                                                                                      |   |                                                                                      |    |                                                         |   |                                                                                      |   |                 |    |                     |    |                                        |
| <p>আপনি যদি একটি প্রাকৃতিক দুর্যোগ মোকাবিলা করতে প্রস্তুত না হন, তবে এর কারণ নিচের কোনটি?<br/>What are the major reasons you don't feel prepared?<br/>(পড়ে শোনান;যতগুলো প্রয়োজন নির্বাচন করুন Read out, select all that apply)<br/>প্রস্তুত না হওয়ার কারণ</p>                                                                                                    | <table border="1"> <tr> <td>1</td> <td>প্রস্তুত হতে অনেক সময়ের প্রয়োজন Takes too much time to become prepared</td> </tr> <tr> <td>2</td> <td>প্রস্তুত হতে অনেক টাকার প্রয়োজন Takes too much money to become prepared</td> </tr> <tr> <td>3</td> <td>কিভাবে প্রস্তুত হতে হবে তা জানা নেই Don't know how to prepare</td> </tr> <tr> <td>4</td> <td>মনে হয় প্রস্তুত হলেও তা ফলপ্রসূ হবে না Feel that preparing would not be effective</td> </tr> <tr> <td>5</td> <td>আমার অগ্রাধিকারের তালিকায় এটা আগের বিষয় নয় It's not high on my list of priorities</td> </tr> <tr> <td>6</td> <td>এখানে প্রাকৃতিক দুর্যোগ হবে বলে মনে করি না Don't think that disaster will occur here</td> </tr> <tr> <td>97</td> <td>অন্যান্য (উল্লেখ করুন) Other (specify)</td> </tr> </table>                                                                                                                                                                                                                                          | 1 | প্রস্তুত হতে অনেক সময়ের প্রয়োজন Takes too much time to become prepared                                                                                                       | 2 | প্রস্তুত হতে অনেক টাকার প্রয়োজন Takes too much money to become prepared                                                                                                         | 3 | কিভাবে প্রস্তুত হতে হবে তা জানা নেই Don't know how to prepare                                                                     | 4 | মনে হয় প্রস্তুত হলেও তা ফলপ্রসূ হবে না Feel that preparing would not be effective                                             | 5  | আমার অগ্রাধিকারের তালিকায় এটা আগের বিষয় নয় It's not high on my list of priorities | 6 | এখানে প্রাকৃতিক দুর্যোগ হবে বলে মনে করি না Don't think that disaster will occur here | 97 | অন্যান্য (উল্লেখ করুন) Other (specify)                  |   |                                                                                      |   |                 |    |                     |    |                                        |
| 1                                                                                                                                                                                                                                                                                                                                                                   | প্রস্তুত হতে অনেক সময়ের প্রয়োজন Takes too much time to become prepared                                                                                                                                                                                                                                                                                                                                                                                                                                                                                                                                                                                                                                                                                                                                                                                                                                                                                                                                           |   |                                                                                                                                                                                |   |                                                                                                                                                                                  |   |                                                                                                                                   |   |                                                                                                                                |    |                                                                                      |   |                                                                                      |    |                                                         |   |                                                                                      |   |                 |    |                     |    |                                        |
| 2                                                                                                                                                                                                                                                                                                                                                                   | প্রস্তুত হতে অনেক টাকার প্রয়োজন Takes too much money to become prepared                                                                                                                                                                                                                                                                                                                                                                                                                                                                                                                                                                                                                                                                                                                                                                                                                                                                                                                                           |   |                                                                                                                                                                                |   |                                                                                                                                                                                  |   |                                                                                                                                   |   |                                                                                                                                |    |                                                                                      |   |                                                                                      |    |                                                         |   |                                                                                      |   |                 |    |                     |    |                                        |
| 3                                                                                                                                                                                                                                                                                                                                                                   | কিভাবে প্রস্তুত হতে হবে তা জানা নেই Don't know how to prepare                                                                                                                                                                                                                                                                                                                                                                                                                                                                                                                                                                                                                                                                                                                                                                                                                                                                                                                                                      |   |                                                                                                                                                                                |   |                                                                                                                                                                                  |   |                                                                                                                                   |   |                                                                                                                                |    |                                                                                      |   |                                                                                      |    |                                                         |   |                                                                                      |   |                 |    |                     |    |                                        |
| 4                                                                                                                                                                                                                                                                                                                                                                   | মনে হয় প্রস্তুত হলেও তা ফলপ্রসূ হবে না Feel that preparing would not be effective                                                                                                                                                                                                                                                                                                                                                                                                                                                                                                                                                                                                                                                                                                                                                                                                                                                                                                                                 |   |                                                                                                                                                                                |   |                                                                                                                                                                                  |   |                                                                                                                                   |   |                                                                                                                                |    |                                                                                      |   |                                                                                      |    |                                                         |   |                                                                                      |   |                 |    |                     |    |                                        |
| 5                                                                                                                                                                                                                                                                                                                                                                   | আমার অগ্রাধিকারের তালিকায় এটা আগের বিষয় নয় It's not high on my list of priorities                                                                                                                                                                                                                                                                                                                                                                                                                                                                                                                                                                                                                                                                                                                                                                                                                                                                                                                               |   |                                                                                                                                                                                |   |                                                                                                                                                                                  |   |                                                                                                                                   |   |                                                                                                                                |    |                                                                                      |   |                                                                                      |    |                                                         |   |                                                                                      |   |                 |    |                     |    |                                        |
| 6                                                                                                                                                                                                                                                                                                                                                                   | এখানে প্রাকৃতিক দুর্যোগ হবে বলে মনে করি না Don't think that disaster will occur here                                                                                                                                                                                                                                                                                                                                                                                                                                                                                                                                                                                                                                                                                                                                                                                                                                                                                                                               |   |                                                                                                                                                                                |   |                                                                                                                                                                                  |   |                                                                                                                                   |   |                                                                                                                                |    |                                                                                      |   |                                                                                      |    |                                                         |   |                                                                                      |   |                 |    |                     |    |                                        |
| 97                                                                                                                                                                                                                                                                                                                                                                  | অন্যান্য (উল্লেখ করুন) Other (specify)                                                                                                                                                                                                                                                                                                                                                                                                                                                                                                                                                                                                                                                                                                                                                                                                                                                                                                                                                                             |   |                                                                                                                                                                                |   |                                                                                                                                                                                  |   |                                                                                                                                   |   |                                                                                                                                |    |                                                                                      |   |                                                                                      |    |                                                         |   |                                                                                      |   |                 |    |                     |    |                                        |
| <p>অন্যান্য (উল্লেখ করুন)Others (Specify)</p>                                                                                                                                                                                                                                                                                                                       |                                                                                                                                                                                                                                                                                                                                                                                                                                                                                                                                                                                                                                                                                                                                                                                                                                                                                                                                                                                                                    |   |                                                                                                                                                                                |   |                                                                                                                                                                                  |   |                                                                                                                                   |   |                                                                                                                                |    |                                                                                      |   |                                                                                      |    |                                                         |   |                                                                                      |   |                 |    |                     |    |                                        |
| <p>যদি দুর্যোগের পূর্বাভাস পান, তাহলে আপনার নিজ খানায় আপনি কি প্রদক্ষেপ নিবেন?<br/>In your own household, what steps would you take if you heard about this last disaster was forecast?<br/>উত্তর বলে দিবেন না, উত্তরদাতার দেয়া প্রযোজ্য সব কয়টি উত্তর নির্বাচন করুন<br/>Do not prompt, select all that apply<br/>পূর্বাভাস পেলে, খানায় কি প্রদক্ষেপ নিবেন?</p> | <table border="1"> <tr> <td>1</td> <td>সবাইকে একটি নিরাপদ স্থানে সরিয়ে নিবো Evacuate everybody to a safe place</td> </tr> <tr> <td>2</td> <td>সক্ষম ব্যক্তিদের একটি নিরাপদ স্থানে সরিয়ে নিবো Evacuate able people to a safe place</td> </tr> <tr> <td>3</td> <td>গুরুত্বপূর্ণ কাগজপত্র নিরাপদে রাখব Secure important documents</td> </tr> <tr> <td>4</td> <td>মূল্যবান জিনিসপত্র নিরাপদে রাখব Secure valuables</td> </tr> <tr> <td>5</td> <td>উৎপাদনশীল সম্পত্তি নিরাপদে রাখব Secure productive assets</td> </tr> <tr> <td>6</td> <td>গবাদি পশু নিরাপদ স্থানে সরিয়ে আনবো Bring livestock to safe areas</td> </tr> <tr> <td>7</td> <td>আপদকালীন সরবরাহ প্রস্তুত করব Prepare emergency supplies</td> </tr> <tr> <td>8</td> <td>ঘরটিকে বৃষ্টি/বাতাসের বিরুদ্ধে শক্তিশালী করবো Strengthen the house against wind/rain</td> </tr> <tr> <td>9</td> <td>কোনটিই নয় None</td> </tr> <tr> <td>99</td> <td>জানা নেই Don't know</td> </tr> <tr> <td>97</td> <td>অন্যান্য (উল্লেখ করুন) Other (specify)</td> </tr> </table> | 1 | সবাইকে একটি নিরাপদ স্থানে সরিয়ে নিবো Evacuate everybody to a safe place                                                                                                       | 2 | সক্ষম ব্যক্তিদের একটি নিরাপদ স্থানে সরিয়ে নিবো Evacuate able people to a safe place                                                                                             | 3 | গুরুত্বপূর্ণ কাগজপত্র নিরাপদে রাখব Secure important documents                                                                     | 4 | মূল্যবান জিনিসপত্র নিরাপদে রাখব Secure valuables                                                                               | 5  | উৎপাদনশীল সম্পত্তি নিরাপদে রাখব Secure productive assets                             | 6 | গবাদি পশু নিরাপদ স্থানে সরিয়ে আনবো Bring livestock to safe areas                    | 7  | আপদকালীন সরবরাহ প্রস্তুত করব Prepare emergency supplies | 8 | ঘরটিকে বৃষ্টি/বাতাসের বিরুদ্ধে শক্তিশালী করবো Strengthen the house against wind/rain | 9 | কোনটিই নয় None | 99 | জানা নেই Don't know | 97 | অন্যান্য (উল্লেখ করুন) Other (specify) |
| 1                                                                                                                                                                                                                                                                                                                                                                   | সবাইকে একটি নিরাপদ স্থানে সরিয়ে নিবো Evacuate everybody to a safe place                                                                                                                                                                                                                                                                                                                                                                                                                                                                                                                                                                                                                                                                                                                                                                                                                                                                                                                                           |   |                                                                                                                                                                                |   |                                                                                                                                                                                  |   |                                                                                                                                   |   |                                                                                                                                |    |                                                                                      |   |                                                                                      |    |                                                         |   |                                                                                      |   |                 |    |                     |    |                                        |
| 2                                                                                                                                                                                                                                                                                                                                                                   | সক্ষম ব্যক্তিদের একটি নিরাপদ স্থানে সরিয়ে নিবো Evacuate able people to a safe place                                                                                                                                                                                                                                                                                                                                                                                                                                                                                                                                                                                                                                                                                                                                                                                                                                                                                                                               |   |                                                                                                                                                                                |   |                                                                                                                                                                                  |   |                                                                                                                                   |   |                                                                                                                                |    |                                                                                      |   |                                                                                      |    |                                                         |   |                                                                                      |   |                 |    |                     |    |                                        |
| 3                                                                                                                                                                                                                                                                                                                                                                   | গুরুত্বপূর্ণ কাগজপত্র নিরাপদে রাখব Secure important documents                                                                                                                                                                                                                                                                                                                                                                                                                                                                                                                                                                                                                                                                                                                                                                                                                                                                                                                                                      |   |                                                                                                                                                                                |   |                                                                                                                                                                                  |   |                                                                                                                                   |   |                                                                                                                                |    |                                                                                      |   |                                                                                      |    |                                                         |   |                                                                                      |   |                 |    |                     |    |                                        |
| 4                                                                                                                                                                                                                                                                                                                                                                   | মূল্যবান জিনিসপত্র নিরাপদে রাখব Secure valuables                                                                                                                                                                                                                                                                                                                                                                                                                                                                                                                                                                                                                                                                                                                                                                                                                                                                                                                                                                   |   |                                                                                                                                                                                |   |                                                                                                                                                                                  |   |                                                                                                                                   |   |                                                                                                                                |    |                                                                                      |   |                                                                                      |    |                                                         |   |                                                                                      |   |                 |    |                     |    |                                        |
| 5                                                                                                                                                                                                                                                                                                                                                                   | উৎপাদনশীল সম্পত্তি নিরাপদে রাখব Secure productive assets                                                                                                                                                                                                                                                                                                                                                                                                                                                                                                                                                                                                                                                                                                                                                                                                                                                                                                                                                           |   |                                                                                                                                                                                |   |                                                                                                                                                                                  |   |                                                                                                                                   |   |                                                                                                                                |    |                                                                                      |   |                                                                                      |    |                                                         |   |                                                                                      |   |                 |    |                     |    |                                        |
| 6                                                                                                                                                                                                                                                                                                                                                                   | গবাদি পশু নিরাপদ স্থানে সরিয়ে আনবো Bring livestock to safe areas                                                                                                                                                                                                                                                                                                                                                                                                                                                                                                                                                                                                                                                                                                                                                                                                                                                                                                                                                  |   |                                                                                                                                                                                |   |                                                                                                                                                                                  |   |                                                                                                                                   |   |                                                                                                                                |    |                                                                                      |   |                                                                                      |    |                                                         |   |                                                                                      |   |                 |    |                     |    |                                        |
| 7                                                                                                                                                                                                                                                                                                                                                                   | আপদকালীন সরবরাহ প্রস্তুত করব Prepare emergency supplies                                                                                                                                                                                                                                                                                                                                                                                                                                                                                                                                                                                                                                                                                                                                                                                                                                                                                                                                                            |   |                                                                                                                                                                                |   |                                                                                                                                                                                  |   |                                                                                                                                   |   |                                                                                                                                |    |                                                                                      |   |                                                                                      |    |                                                         |   |                                                                                      |   |                 |    |                     |    |                                        |
| 8                                                                                                                                                                                                                                                                                                                                                                   | ঘরটিকে বৃষ্টি/বাতাসের বিরুদ্ধে শক্তিশালী করবো Strengthen the house against wind/rain                                                                                                                                                                                                                                                                                                                                                                                                                                                                                                                                                                                                                                                                                                                                                                                                                                                                                                                               |   |                                                                                                                                                                                |   |                                                                                                                                                                                  |   |                                                                                                                                   |   |                                                                                                                                |    |                                                                                      |   |                                                                                      |    |                                                         |   |                                                                                      |   |                 |    |                     |    |                                        |
| 9                                                                                                                                                                                                                                                                                                                                                                   | কোনটিই নয় None                                                                                                                                                                                                                                                                                                                                                                                                                                                                                                                                                                                                                                                                                                                                                                                                                                                                                                                                                                                                    |   |                                                                                                                                                                                |   |                                                                                                                                                                                  |   |                                                                                                                                   |   |                                                                                                                                |    |                                                                                      |   |                                                                                      |    |                                                         |   |                                                                                      |   |                 |    |                     |    |                                        |
| 99                                                                                                                                                                                                                                                                                                                                                                  | জানা নেই Don't know                                                                                                                                                                                                                                                                                                                                                                                                                                                                                                                                                                                                                                                                                                                                                                                                                                                                                                                                                                                                |   |                                                                                                                                                                                |   |                                                                                                                                                                                  |   |                                                                                                                                   |   |                                                                                                                                |    |                                                                                      |   |                                                                                      |    |                                                         |   |                                                                                      |   |                 |    |                     |    |                                        |
| 97                                                                                                                                                                                                                                                                                                                                                                  | অন্যান্য (উল্লেখ করুন) Other (specify)                                                                                                                                                                                                                                                                                                                                                                                                                                                                                                                                                                                                                                                                                                                                                                                                                                                                                                                                                                             |   |                                                                                                                                                                                |   |                                                                                                                                                                                  |   |                                                                                                                                   |   |                                                                                                                                |    |                                                                                      |   |                                                                                      |    |                                                         |   |                                                                                      |   |                 |    |                     |    |                                        |
| <p>অন্যান্য (উল্লেখ করুন)Others (Specify)</p>                                                                                                                                                                                                                                                                                                                       |                                                                                                                                                                                                                                                                                                                                                                                                                                                                                                                                                                                                                                                                                                                                                                                                                                                                                                                                                                                                                    |   |                                                                                                                                                                                |   |                                                                                                                                                                                  |   |                                                                                                                                   |   |                                                                                                                                |    |                                                                                      |   |                                                                                      |    |                                                         |   |                                                                                      |   |                 |    |                     |    |                                        |
| <p>আপনার খানায় কি বর্তমানে নিম্নোক্ত জিনিসগুলো আছে?<br/>Does your household currently have any of the following?<br/>(পড়ে শোনান;যতগুলো প্রয়োজন নির্বাচন করুন Read out, select all that apply)<br/>খানার সম্পদ</p>                                                                                                                                                | <table border="1"> <tr> <td>1</td> <td>সর্বসম্মত নিরাপদে সরে যাবার স্থান An agreed place to evacuate to</td> </tr> <tr> <td>2</td> <td>যারা এখানে বাস করেন তাদের প্রত্যেকের ৩দিনের পানি সরবরাহ ( একজনের প্রতিদিন ১গ্যালন করে) 3-day supply of water (1 gallon of water per person per day) for everyone who lives there</td> </tr> <tr> <td>3</td> <td>যারা এখানে বাস করেন তাদের প্রত্যেকের ৩দিনের অপচনশীল খাবার সরবরাহ 3-day supply of non-perishable food for everyone who lives there</td> </tr> <tr> <td>4</td> <td>পরিবারের যে সকল সদস্যের ঔষধ প্রয়োজন, তাদের ৩দিনের ঔষধ 3-day supply of medicine for each family member who requires medication</td> </tr> </table>                                                                                                                                                                                                                                                                                                                                         | 1 | সর্বসম্মত নিরাপদে সরে যাবার স্থান An agreed place to evacuate to                                                                                                               | 2 | যারা এখানে বাস করেন তাদের প্রত্যেকের ৩দিনের পানি সরবরাহ ( একজনের প্রতিদিন ১গ্যালন করে) 3-day supply of water (1 gallon of water per person per day) for everyone who lives there | 3 | যারা এখানে বাস করেন তাদের প্রত্যেকের ৩দিনের অপচনশীল খাবার সরবরাহ 3-day supply of non-perishable food for everyone who lives there | 4 | পরিবারের যে সকল সদস্যের ঔষধ প্রয়োজন, তাদের ৩দিনের ঔষধ 3-day supply of medicine for each family member who requires medication |    |                                                                                      |   |                                                                                      |    |                                                         |   |                                                                                      |   |                 |    |                     |    |                                        |
| 1                                                                                                                                                                                                                                                                                                                                                                   | সর্বসম্মত নিরাপদে সরে যাবার স্থান An agreed place to evacuate to                                                                                                                                                                                                                                                                                                                                                                                                                                                                                                                                                                                                                                                                                                                                                                                                                                                                                                                                                   |   |                                                                                                                                                                                |   |                                                                                                                                                                                  |   |                                                                                                                                   |   |                                                                                                                                |    |                                                                                      |   |                                                                                      |    |                                                         |   |                                                                                      |   |                 |    |                     |    |                                        |
| 2                                                                                                                                                                                                                                                                                                                                                                   | যারা এখানে বাস করেন তাদের প্রত্যেকের ৩দিনের পানি সরবরাহ ( একজনের প্রতিদিন ১গ্যালন করে) 3-day supply of water (1 gallon of water per person per day) for everyone who lives there                                                                                                                                                                                                                                                                                                                                                                                                                                                                                                                                                                                                                                                                                                                                                                                                                                   |   |                                                                                                                                                                                |   |                                                                                                                                                                                  |   |                                                                                                                                   |   |                                                                                                                                |    |                                                                                      |   |                                                                                      |    |                                                         |   |                                                                                      |   |                 |    |                     |    |                                        |
| 3                                                                                                                                                                                                                                                                                                                                                                   | যারা এখানে বাস করেন তাদের প্রত্যেকের ৩দিনের অপচনশীল খাবার সরবরাহ 3-day supply of non-perishable food for everyone who lives there                                                                                                                                                                                                                                                                                                                                                                                                                                                                                                                                                                                                                                                                                                                                                                                                                                                                                  |   |                                                                                                                                                                                |   |                                                                                                                                                                                  |   |                                                                                                                                   |   |                                                                                                                                |    |                                                                                      |   |                                                                                      |    |                                                         |   |                                                                                      |   |                 |    |                     |    |                                        |
| 4                                                                                                                                                                                                                                                                                                                                                                   | পরিবারের যে সকল সদস্যের ঔষধ প্রয়োজন, তাদের ৩দিনের ঔষধ 3-day supply of medicine for each family member who requires medication                                                                                                                                                                                                                                                                                                                                                                                                                                                                                                                                                                                                                                                                                                                                                                                                                                                                                     |   |                                                                                                                                                                                |   |                                                                                                                                                                                  |   |                                                                                                                                   |   |                                                                                                                                |    |                                                                                      |   |                                                                                      |    |                                                         |   |                                                                                      |   |                 |    |                     |    |                                        |

|                                                                                                                                                                                                                                                                                                                                                                                                                                                                        |                                                                                                                                                                                                                                                                                                                                                                                                                                                                                                                                                                                                                                                                                         |    |                                             |   |                                                                                             |   |                                                           |   |                                                                           |   |                                                     |    |                                                                |    |                                                         |    |                                        |    |                    |    |                          |
|------------------------------------------------------------------------------------------------------------------------------------------------------------------------------------------------------------------------------------------------------------------------------------------------------------------------------------------------------------------------------------------------------------------------------------------------------------------------|-----------------------------------------------------------------------------------------------------------------------------------------------------------------------------------------------------------------------------------------------------------------------------------------------------------------------------------------------------------------------------------------------------------------------------------------------------------------------------------------------------------------------------------------------------------------------------------------------------------------------------------------------------------------------------------------|----|---------------------------------------------|---|---------------------------------------------------------------------------------------------|---|-----------------------------------------------------------|---|---------------------------------------------------------------------------|---|-----------------------------------------------------|----|----------------------------------------------------------------|----|---------------------------------------------------------|----|----------------------------------------|----|--------------------|----|--------------------------|
|                                                                                                                                                                                                                                                                                                                                                                                                                                                                        | <table border="1"> <tr><td>5</td><td>ব্যাটারী চালিত রেডিও Battery operated radio</td></tr> <tr><td>6</td><td>ব্যাটারী Batteries</td></tr> <tr><td>7</td><td>টর্চলাইট Flashlight</td></tr> <tr><td>8</td><td>প্রাথমিক চিকিৎসা সরঞ্জাম First Aid Kit</td></tr> <tr><td>9</td><td>জেনারেটর Generator</td></tr> <tr><td>10</td><td>কম্বল Blankets</td></tr> <tr><td>12</td><td>এগুলোর কোনোটাই আমার নেই I don't have any of these items</td></tr> </table>                                                                                                                                                                                                                                   | 5  | ব্যাটারী চালিত রেডিও Battery operated radio | 6 | ব্যাটারী Batteries                                                                          | 7 | টর্চলাইট Flashlight                                       | 8 | প্রাথমিক চিকিৎসা সরঞ্জাম First Aid Kit                                    | 9 | জেনারেটর Generator                                  | 10 | কম্বল Blankets                                                 | 12 | এগুলোর কোনোটাই আমার নেই I don't have any of these items |    |                                        |    |                    |    |                          |
| 5                                                                                                                                                                                                                                                                                                                                                                                                                                                                      | ব্যাটারী চালিত রেডিও Battery operated radio                                                                                                                                                                                                                                                                                                                                                                                                                                                                                                                                                                                                                                             |    |                                             |   |                                                                                             |   |                                                           |   |                                                                           |   |                                                     |    |                                                                |    |                                                         |    |                                        |    |                    |    |                          |
| 6                                                                                                                                                                                                                                                                                                                                                                                                                                                                      | ব্যাটারী Batteries                                                                                                                                                                                                                                                                                                                                                                                                                                                                                                                                                                                                                                                                      |    |                                             |   |                                                                                             |   |                                                           |   |                                                                           |   |                                                     |    |                                                                |    |                                                         |    |                                        |    |                    |    |                          |
| 7                                                                                                                                                                                                                                                                                                                                                                                                                                                                      | টর্চলাইট Flashlight                                                                                                                                                                                                                                                                                                                                                                                                                                                                                                                                                                                                                                                                     |    |                                             |   |                                                                                             |   |                                                           |   |                                                                           |   |                                                     |    |                                                                |    |                                                         |    |                                        |    |                    |    |                          |
| 8                                                                                                                                                                                                                                                                                                                                                                                                                                                                      | প্রাথমিক চিকিৎসা সরঞ্জাম First Aid Kit                                                                                                                                                                                                                                                                                                                                                                                                                                                                                                                                                                                                                                                  |    |                                             |   |                                                                                             |   |                                                           |   |                                                                           |   |                                                     |    |                                                                |    |                                                         |    |                                        |    |                    |    |                          |
| 9                                                                                                                                                                                                                                                                                                                                                                                                                                                                      | জেনারেটর Generator                                                                                                                                                                                                                                                                                                                                                                                                                                                                                                                                                                                                                                                                      |    |                                             |   |                                                                                             |   |                                                           |   |                                                                           |   |                                                     |    |                                                                |    |                                                         |    |                                        |    |                    |    |                          |
| 10                                                                                                                                                                                                                                                                                                                                                                                                                                                                     | কম্বল Blankets                                                                                                                                                                                                                                                                                                                                                                                                                                                                                                                                                                                                                                                                          |    |                                             |   |                                                                                             |   |                                                           |   |                                                                           |   |                                                     |    |                                                                |    |                                                         |    |                                        |    |                    |    |                          |
| 12                                                                                                                                                                                                                                                                                                                                                                                                                                                                     | এগুলোর কোনোটাই আমার নেই I don't have any of these items                                                                                                                                                                                                                                                                                                                                                                                                                                                                                                                                                                                                                                 |    |                                             |   |                                                                                             |   |                                                           |   |                                                                           |   |                                                     |    |                                                                |    |                                                         |    |                                        |    |                    |    |                          |
| <p>[যদি নিরাপদে সরে যাবার স্থান নির্বাচিত থাকে]<br/>নিরাপদে সরে যাবার স্থানটি কোথায়?<br/>[If evacuation point selected]<br/>Where is the evacuation point?</p> <p>উত্তর বলে দিবেন না, উত্তরদাতার দেয়া প্রযোজ্য সব<br/>কয়টি উত্তর নির্বাচন করুন<br/>Do not prompt, select all that apply<br/>স্থানটি কোথায়</p>                                                                                                                                                      | <table border="1"> <tr><td>1</td><td>ঝড় আশ্রয়কেন্দ্র Storm shelter</td><td>4</td><td>বড় ঘর Big house</td></tr> <tr><td>2</td><td>মসজিদ Mosque</td><td>5</td><td>উঁচু জমি High ground</td></tr> <tr><td>3</td><td>স্কুল/কলেজ School/College</td><td>99</td><td>জানি না Don't know</td></tr> <tr><td></td><td></td><td>97</td><td>অন্যান্য (উল্লেখ করুন) Others, specify</td></tr> </table>                                                                                                                                                                                                                                                                                            | 1  | ঝড় আশ্রয়কেন্দ্র Storm shelter             | 4 | বড় ঘর Big house                                                                            | 2 | মসজিদ Mosque                                              | 5 | উঁচু জমি High ground                                                      | 3 | স্কুল/কলেজ School/College                           | 99 | জানি না Don't know                                             |    |                                                         | 97 | অন্যান্য (উল্লেখ করুন) Others, specify |    |                    |    |                          |
| 1                                                                                                                                                                                                                                                                                                                                                                                                                                                                      | ঝড় আশ্রয়কেন্দ্র Storm shelter                                                                                                                                                                                                                                                                                                                                                                                                                                                                                                                                                                                                                                                         | 4  | বড় ঘর Big house                            |   |                                                                                             |   |                                                           |   |                                                                           |   |                                                     |    |                                                                |    |                                                         |    |                                        |    |                    |    |                          |
| 2                                                                                                                                                                                                                                                                                                                                                                                                                                                                      | মসজিদ Mosque                                                                                                                                                                                                                                                                                                                                                                                                                                                                                                                                                                                                                                                                            | 5  | উঁচু জমি High ground                        |   |                                                                                             |   |                                                           |   |                                                                           |   |                                                     |    |                                                                |    |                                                         |    |                                        |    |                    |    |                          |
| 3                                                                                                                                                                                                                                                                                                                                                                                                                                                                      | স্কুল/কলেজ School/College                                                                                                                                                                                                                                                                                                                                                                                                                                                                                                                                                                                                                                                               | 99 | জানি না Don't know                          |   |                                                                                             |   |                                                           |   |                                                                           |   |                                                     |    |                                                                |    |                                                         |    |                                        |    |                    |    |                          |
|                                                                                                                                                                                                                                                                                                                                                                                                                                                                        |                                                                                                                                                                                                                                                                                                                                                                                                                                                                                                                                                                                                                                                                                         | 97 | অন্যান্য (উল্লেখ করুন) Others, specify      |   |                                                                                             |   |                                                           |   |                                                                           |   |                                                     |    |                                                                |    |                                                         |    |                                        |    |                    |    |                          |
| অন্যান্য (উল্লেখ করুন)Others (Specify)                                                                                                                                                                                                                                                                                                                                                                                                                                 |                                                                                                                                                                                                                                                                                                                                                                                                                                                                                                                                                                                                                                                                                         |    |                                             |   |                                                                                             |   |                                                           |   |                                                                           |   |                                                     |    |                                                                |    |                                                         |    |                                        |    |                    |    |                          |
| <p>[If evacuation point selected]<br/>[যদি নিরাপদে সরে যাবার স্থান নির্বাচিত থাকে]<br/>এলাকাটি কতটুকু নিরাপদ বলে আপনি মনে করেন?<br/>How safe do you think this area is?<br/>(একটি নির্বাচন করুন Prompt, select one)<br/>কতটুকু নিরাপদ</p>                                                                                                                                                                                                                              | <table border="1"> <tr><td>1</td><td>নিরাপদ নয় Unsafe</td><td>3</td><td>নিরাপদ Safe</td></tr> <tr><td>2</td><td>মোটামুটি নিরাপদ Somewhat safe</td><td>4</td><td>নিশ্চিত নয় Not sure</td></tr> </table>                                                                                                                                                                                                                                                                                                                                                                                                                                                                                | 1  | নিরাপদ নয় Unsafe                           | 3 | নিরাপদ Safe                                                                                 | 2 | মোটামুটি নিরাপদ Somewhat safe                             | 4 | নিশ্চিত নয় Not sure                                                      |   |                                                     |    |                                                                |    |                                                         |    |                                        |    |                    |    |                          |
| 1                                                                                                                                                                                                                                                                                                                                                                                                                                                                      | নিরাপদ নয় Unsafe                                                                                                                                                                                                                                                                                                                                                                                                                                                                                                                                                                                                                                                                       | 3  | নিরাপদ Safe                                 |   |                                                                                             |   |                                                           |   |                                                                           |   |                                                     |    |                                                                |    |                                                         |    |                                        |    |                    |    |                          |
| 2                                                                                                                                                                                                                                                                                                                                                                                                                                                                      | মোটামুটি নিরাপদ Somewhat safe                                                                                                                                                                                                                                                                                                                                                                                                                                                                                                                                                                                                                                                           | 4  | নিশ্চিত নয় Not sure                        |   |                                                                                             |   |                                                           |   |                                                                           |   |                                                     |    |                                                                |    |                                                         |    |                                        |    |                    |    |                          |
| <p>এই (প্রাকৃতিক দুর্যোগের) পূর্বাভাস পাবার পরও<br/>আপনার পরিবারের কিছু বা সকল সদস্যও নিরাপদ<br/>স্থানে সরে না যাবার কি কোনো কারণ আছে?<br/>Are there any reasons why some or all of your<br/>household members did not evacuate when you<br/>heard the most recent natural disaster was<br/>forecast?</p> <p>(উত্তর বলে দিবেন না, উত্তরদাতা যে কয়টি বলবে,<br/>সবকটি বৃত্তায়িত করুন Do not prompt, select all<br/>that apply)<br/>নিরাপদ স্থানে সরে না যাবার কারণ</p> | <table border="1"> <tr><td>1</td><td>এখানেই যথেষ্ট নিরাপদ Safe enough here</td></tr> <tr><td>2</td><td>নিরাপদে সরে যেতে প্রচুর অর্থ বা সময়ের প্রয়োজন Too expensive or time-consuming to evacuate</td></tr> <tr><td>3</td><td>সরে যেতে ভয় হয় Afraid to leave</td></tr> <tr><td>4</td><td>সম্পত্তি দেখাশোনা করার জন্য থাকতে হবে Need to stay to look after property</td></tr> <tr><td>5</td><td>পূর্বাভাসের উপর ভরসা নেই Forecasts are not reliable</td></tr> <tr><td>6</td><td>না, আমরা সবাই নিরাপদ স্থানে সরে যাবো No, we would all evacuate</td></tr> <tr><td>99</td><td>জানি না Don't know</td></tr> <tr><td>97</td><td>অন্যান্য (উল্লেখ করুন) Other (specify)</td></tr> </table> | 1  | এখানেই যথেষ্ট নিরাপদ Safe enough here       | 2 | নিরাপদে সরে যেতে প্রচুর অর্থ বা সময়ের প্রয়োজন Too expensive or time-consuming to evacuate | 3 | সরে যেতে ভয় হয় Afraid to leave                          | 4 | সম্পত্তি দেখাশোনা করার জন্য থাকতে হবে Need to stay to look after property | 5 | পূর্বাভাসের উপর ভরসা নেই Forecasts are not reliable | 6  | না, আমরা সবাই নিরাপদ স্থানে সরে যাবো No, we would all evacuate | 99 | জানি না Don't know                                      | 97 | অন্যান্য (উল্লেখ করুন) Other (specify) |    |                    |    |                          |
| 1                                                                                                                                                                                                                                                                                                                                                                                                                                                                      | এখানেই যথেষ্ট নিরাপদ Safe enough here                                                                                                                                                                                                                                                                                                                                                                                                                                                                                                                                                                                                                                                   |    |                                             |   |                                                                                             |   |                                                           |   |                                                                           |   |                                                     |    |                                                                |    |                                                         |    |                                        |    |                    |    |                          |
| 2                                                                                                                                                                                                                                                                                                                                                                                                                                                                      | নিরাপদে সরে যেতে প্রচুর অর্থ বা সময়ের প্রয়োজন Too expensive or time-consuming to evacuate                                                                                                                                                                                                                                                                                                                                                                                                                                                                                                                                                                                             |    |                                             |   |                                                                                             |   |                                                           |   |                                                                           |   |                                                     |    |                                                                |    |                                                         |    |                                        |    |                    |    |                          |
| 3                                                                                                                                                                                                                                                                                                                                                                                                                                                                      | সরে যেতে ভয় হয় Afraid to leave                                                                                                                                                                                                                                                                                                                                                                                                                                                                                                                                                                                                                                                        |    |                                             |   |                                                                                             |   |                                                           |   |                                                                           |   |                                                     |    |                                                                |    |                                                         |    |                                        |    |                    |    |                          |
| 4                                                                                                                                                                                                                                                                                                                                                                                                                                                                      | সম্পত্তি দেখাশোনা করার জন্য থাকতে হবে Need to stay to look after property                                                                                                                                                                                                                                                                                                                                                                                                                                                                                                                                                                                                               |    |                                             |   |                                                                                             |   |                                                           |   |                                                                           |   |                                                     |    |                                                                |    |                                                         |    |                                        |    |                    |    |                          |
| 5                                                                                                                                                                                                                                                                                                                                                                                                                                                                      | পূর্বাভাসের উপর ভরসা নেই Forecasts are not reliable                                                                                                                                                                                                                                                                                                                                                                                                                                                                                                                                                                                                                                     |    |                                             |   |                                                                                             |   |                                                           |   |                                                                           |   |                                                     |    |                                                                |    |                                                         |    |                                        |    |                    |    |                          |
| 6                                                                                                                                                                                                                                                                                                                                                                                                                                                                      | না, আমরা সবাই নিরাপদ স্থানে সরে যাবো No, we would all evacuate                                                                                                                                                                                                                                                                                                                                                                                                                                                                                                                                                                                                                          |    |                                             |   |                                                                                             |   |                                                           |   |                                                                           |   |                                                     |    |                                                                |    |                                                         |    |                                        |    |                    |    |                          |
| 99                                                                                                                                                                                                                                                                                                                                                                                                                                                                     | জানি না Don't know                                                                                                                                                                                                                                                                                                                                                                                                                                                                                                                                                                                                                                                                      |    |                                             |   |                                                                                             |   |                                                           |   |                                                                           |   |                                                     |    |                                                                |    |                                                         |    |                                        |    |                    |    |                          |
| 97                                                                                                                                                                                                                                                                                                                                                                                                                                                                     | অন্যান্য (উল্লেখ করুন) Other (specify)                                                                                                                                                                                                                                                                                                                                                                                                                                                                                                                                                                                                                                                  |    |                                             |   |                                                                                             |   |                                                           |   |                                                                           |   |                                                     |    |                                                                |    |                                                         |    |                                        |    |                    |    |                          |
| অন্যান্য (উল্লেখ করুন)Others (Specify)                                                                                                                                                                                                                                                                                                                                                                                                                                 |                                                                                                                                                                                                                                                                                                                                                                                                                                                                                                                                                                                                                                                                                         |    |                                             |   |                                                                                             |   |                                                           |   |                                                                           |   |                                                     |    |                                                                |    |                                                         |    |                                        |    |                    |    |                          |
| <p>এই প্রাকৃতিক দুর্যোগে যদি আপনার খানায় ক্ষতি হয়,<br/>তাহলে আপনি সাহায্যের জন্য কার উপর ভরসা<br/>করবেন?<br/>If your household suffered as a result of [this<br/>natural disaster], who could you rely on to help<br/>you?</p> <p>(উত্তর বলে দিবেন না, উত্তরদাতা যে কয়টি বলবে,<br/>সবকটি বৃত্তায়িত করুন Do not prompt, select all that<br/>apply)<br/>সাহায্যের জন্য কার উপর ভরসা করবেন</p>                                                                        | <table border="1"> <tr><td>1</td><td>বন্ধু বা প্রতিবেশী Friends or neighbours</td></tr> <tr><td>2</td><td>আত্মীয় - স্বজন Relatives</td></tr> <tr><td>3</td><td>এলাকার সম্ভ্রান্ত/ধনী মানুষ Elite/rich people in the area</td></tr> <tr><td>4</td><td>ধর্মীয় নেতৃবৃন্দ Religious leaders</td></tr> <tr><td>5</td><td>সরকারী কর্তৃপক্ষ Government authorities</td></tr> <tr><td>6</td><td>উদ্ধারকারী দল/ স্বচ্ছসেবক দল Savings groups / self-help groups</td></tr> <tr><td>7</td><td>এন.জি.ও সমূহ NGOs</td></tr> <tr><td>8</td><td>কারো কাছ থেকে নয় Nobody</td></tr> <tr><td>99</td><td>জানি না Don't know</td></tr> <tr><td>97</td><td>অন্যান্য Other (specify)</td></tr> </table>    | 1  | বন্ধু বা প্রতিবেশী Friends or neighbours    | 2 | আত্মীয় - স্বজন Relatives                                                                   | 3 | এলাকার সম্ভ্রান্ত/ধনী মানুষ Elite/rich people in the area | 4 | ধর্মীয় নেতৃবৃন্দ Religious leaders                                       | 5 | সরকারী কর্তৃপক্ষ Government authorities             | 6  | উদ্ধারকারী দল/ স্বচ্ছসেবক দল Savings groups / self-help groups | 7  | এন.জি.ও সমূহ NGOs                                       | 8  | কারো কাছ থেকে নয় Nobody               | 99 | জানি না Don't know | 97 | অন্যান্য Other (specify) |
| 1                                                                                                                                                                                                                                                                                                                                                                                                                                                                      | বন্ধু বা প্রতিবেশী Friends or neighbours                                                                                                                                                                                                                                                                                                                                                                                                                                                                                                                                                                                                                                                |    |                                             |   |                                                                                             |   |                                                           |   |                                                                           |   |                                                     |    |                                                                |    |                                                         |    |                                        |    |                    |    |                          |
| 2                                                                                                                                                                                                                                                                                                                                                                                                                                                                      | আত্মীয় - স্বজন Relatives                                                                                                                                                                                                                                                                                                                                                                                                                                                                                                                                                                                                                                                               |    |                                             |   |                                                                                             |   |                                                           |   |                                                                           |   |                                                     |    |                                                                |    |                                                         |    |                                        |    |                    |    |                          |
| 3                                                                                                                                                                                                                                                                                                                                                                                                                                                                      | এলাকার সম্ভ্রান্ত/ধনী মানুষ Elite/rich people in the area                                                                                                                                                                                                                                                                                                                                                                                                                                                                                                                                                                                                                               |    |                                             |   |                                                                                             |   |                                                           |   |                                                                           |   |                                                     |    |                                                                |    |                                                         |    |                                        |    |                    |    |                          |
| 4                                                                                                                                                                                                                                                                                                                                                                                                                                                                      | ধর্মীয় নেতৃবৃন্দ Religious leaders                                                                                                                                                                                                                                                                                                                                                                                                                                                                                                                                                                                                                                                     |    |                                             |   |                                                                                             |   |                                                           |   |                                                                           |   |                                                     |    |                                                                |    |                                                         |    |                                        |    |                    |    |                          |
| 5                                                                                                                                                                                                                                                                                                                                                                                                                                                                      | সরকারী কর্তৃপক্ষ Government authorities                                                                                                                                                                                                                                                                                                                                                                                                                                                                                                                                                                                                                                                 |    |                                             |   |                                                                                             |   |                                                           |   |                                                                           |   |                                                     |    |                                                                |    |                                                         |    |                                        |    |                    |    |                          |
| 6                                                                                                                                                                                                                                                                                                                                                                                                                                                                      | উদ্ধারকারী দল/ স্বচ্ছসেবক দল Savings groups / self-help groups                                                                                                                                                                                                                                                                                                                                                                                                                                                                                                                                                                                                                          |    |                                             |   |                                                                                             |   |                                                           |   |                                                                           |   |                                                     |    |                                                                |    |                                                         |    |                                        |    |                    |    |                          |
| 7                                                                                                                                                                                                                                                                                                                                                                                                                                                                      | এন.জি.ও সমূহ NGOs                                                                                                                                                                                                                                                                                                                                                                                                                                                                                                                                                                                                                                                                       |    |                                             |   |                                                                                             |   |                                                           |   |                                                                           |   |                                                     |    |                                                                |    |                                                         |    |                                        |    |                    |    |                          |
| 8                                                                                                                                                                                                                                                                                                                                                                                                                                                                      | কারো কাছ থেকে নয় Nobody                                                                                                                                                                                                                                                                                                                                                                                                                                                                                                                                                                                                                                                                |    |                                             |   |                                                                                             |   |                                                           |   |                                                                           |   |                                                     |    |                                                                |    |                                                         |    |                                        |    |                    |    |                          |
| 99                                                                                                                                                                                                                                                                                                                                                                                                                                                                     | জানি না Don't know                                                                                                                                                                                                                                                                                                                                                                                                                                                                                                                                                                                                                                                                      |    |                                             |   |                                                                                             |   |                                                           |   |                                                                           |   |                                                     |    |                                                                |    |                                                         |    |                                        |    |                    |    |                          |
| 97                                                                                                                                                                                                                                                                                                                                                                                                                                                                     | অন্যান্য Other (specify)                                                                                                                                                                                                                                                                                                                                                                                                                                                                                                                                                                                                                                                                |    |                                             |   |                                                                                             |   |                                                           |   |                                                                           |   |                                                     |    |                                                                |    |                                                         |    |                                        |    |                    |    |                          |
| অন্যান্য (উল্লেখ করুন)Others (Specify)                                                                                                                                                                                                                                                                                                                                                                                                                                 |                                                                                                                                                                                                                                                                                                                                                                                                                                                                                                                                                                                                                                                                                         |    |                                             |   |                                                                                             |   |                                                           |   |                                                                           |   |                                                     |    |                                                                |    |                                                         |    |                                        |    |                    |    |                          |
