# Supplementary material for: Exploring the impact, response and preparedness to water-related natural disasters in the Barisal division of Bangladesh: a mixed methods study
Source: PubMed Central journal article supplement — BMJ Open. 2019 Apr 4;9(4):e026459. doi: 10.1136/bmjopen-2018-026459 (PMC6500363; doi:10.1136/bmjopen-2018-026459), 2019-04-04
Supplement: bmjopen-2018-026459supp003.pdf [file bmjopen-2018-026459supp003.pdf]

|                                                                                           |                                                                             |                                                                                                                                                                                                                                                                                                                                                                                                                                                                                                                                                                                                                                                                                                                                                                                                                                                                                                                                                                                                                                                                                                                          |
|-------------------------------------------------------------------------------------------|-----------------------------------------------------------------------------|--------------------------------------------------------------------------------------------------------------------------------------------------------------------------------------------------------------------------------------------------------------------------------------------------------------------------------------------------------------------------------------------------------------------------------------------------------------------------------------------------------------------------------------------------------------------------------------------------------------------------------------------------------------------------------------------------------------------------------------------------------------------------------------------------------------------------------------------------------------------------------------------------------------------------------------------------------------------------------------------------------------------------------------------------------------------------------------------------------------------------|
|                                                                                           |                                                                             | <p>-Do many community members use these methods? Do you use these methods? If <b>yes</b> or <b>no</b>, then why? Do you think they are adequate to keep your household and family safe?</p> <p><u>-Do you assist community members in implementing disaster preparedness systems? If <b>yes</b>, do you receive any support from government for this?</u></p>                                                                                                                                                                                                                                                                                                                                                                                                                                                                                                                                                                                                                                                                                                                                                            |
|                                                                                           | Existing practices during a disaster                                        | <p>-Does your community have a disaster management committee? If <b>yes</b>, who is part of it?</p> <p>-Does your community have any kind of plan to deal with disasters? If <b>yes</b>, please describe. If <b>no</b>, why? Do you know if a risk assessment has ever been performed for the area?</p> <p>-Has the community ever practiced responding to a disaster? Did you participate in this drill?</p> <p>- Who do you think plays an important role in responding to disasters in your area?</p> <p>-What systems are in place to warn community members when a disaster is approaching? If <b>yes</b>, who is responsible for running this?</p> <p><u>-Do you have a role in warning the community? If <b>yes</b>, how do you know when to begin? Who leads the operation? How many other people work alongside you? What instructions do you provide community members with? Do you receive any support from government?</u></p> <p>-What do community people generally do during a disaster? How do they try to stay safe?</p> <p>-Do community people use local cyclone centres? If <b>no</b>, then why?</p> |
|                                                                                           | Existing practices following a disaster                                     | <p>-What happens after the disaster? How does community come back to their day to day activities?</p> <p><u>-Do you have a role in post-disaster clean-up? If <b>yes</b>, what does this involve? Who coordinates clean-up efforts? Do you receive any support from government?</u></p> <p>-What is done if parts of the community are no longer safe to be in/around (unstable infrastructure, flooded areas etc)?</p> <p><u>- What do you think your area needs to help it better prepare and respond to disasters?</u></p>                                                                                                                                                                                                                                                                                                                                                                                                                                                                                                                                                                                            |
| <b>Understand role and measure in disaster relief management associated with drowning</b> |                                                                             |                                                                                                                                                                                                                                                                                                                                                                                                                                                                                                                                                                                                                                                                                                                                                                                                                                                                                                                                                                                                                                                                                                                          |
|                                                                                           | To identify key responsibilities and involvement with disaster and drowning | <p>-Have you personally assisted with any drowning cases? If <b>yes</b>, please provide detail. How could you have been better supported to handle these people?</p>                                                                                                                                                                                                                                                                                                                                                                                                                                                                                                                                                                                                                                                                                                                                                                                                                                                                                                                                                     |
| <b>Explore health seeking behaviours of disaster related drowning events</b>              |                                                                             |                                                                                                                                                                                                                                                                                                                                                                                                                                                                                                                                                                                                                                                                                                                                                                                                                                                                                                                                                                                                                                                                                                                          |
|                                                                                           | Health seeking behaviours post-drowning due to disaster                     | <p>-What health facilities are available during/directly following a disaster? Are these different from regular health facilities? Are they appropriate/adequate for the community's needs?</p> <p>-What health facilities do you think are needed to treat community members following a disaster? What are</p>                                                                                                                                                                                                                                                                                                                                                                                                                                                                                                                                                                                                                                                                                                                                                                                                         |

|                                                                                                                                                                                                                                                                                                                                                                                                                                                         |  |                                                                                                                                                                                                    |
|---------------------------------------------------------------------------------------------------------------------------------------------------------------------------------------------------------------------------------------------------------------------------------------------------------------------------------------------------------------------------------------------------------------------------------------------------------|--|----------------------------------------------------------------------------------------------------------------------------------------------------------------------------------------------------|
|                                                                                                                                                                                                                                                                                                                                                                                                                                                         |  | <p>some important features these services should have?<br/>         Do you have any thoughts or preferences about who could provide these? <i>[Probe: government, NGO, other organisation]</i></p> |
| <b>Exit Questions</b>                                                                                                                                                                                                                                                                                                                                                                                                                                   |  |                                                                                                                                                                                                    |
| <p>During our conversation, you mentioned W, X, Y, Z measures that could be taken to improve disaster preparedness for the community (and or post disaster measures) during or directly following a disaster. If you were to rank these from 1 to 5 (1 being most helpful and 5 least helpful in your community), what would the order be? And why? <i>[probe with high risk group- community need, feasibility, acceptability, sustainability]</i></p> |  |                                                                                                                                                                                                    |

Topics to address in this FGD guide:

- Investigate the impact of aquatic disasters (natural and human) on the community
- Explore current disaster preparedness practices/resilience
- Explore health seeking behaviours of disaster related drowning events
- Understand role and measure in disaster relief management associated with drowning

### Introduction

#### Introductory statement

Welcome, and thank you for agreeing to be part of today's focus group discussion. We appreciate your willingness to participate and the time you have taken out of your day to take part.

My name is.....and I am from the Centre for Injury Prevention and Research, Bangladesh in Dhaka. We are conducting these discussions with members of the Barisal community who have experienced natural or human disaster. Our aim is to understand your views and experiences in relation to disaster-related drowning so that we can find out the best way to reduce it in Bangladesh and in your communities. We would like to find out from you what your thoughts/opinions and concerns are about drowning and how we can work together with you to reduce drowning related deaths and disabilities in your communities.

First I would like to cover some general rules about how this discussion will run:

1. We would like you all to do the talking and to hear from everyone in the group.
2. Only one person should speak at a time so please wait for the person talking to finish.
3. There are no right or wrong answers – every person's opinion and view is important and we would like to hear a range of different views.
4. Anything discussed in this room remains in this room. We want everyone to feel comfortable about discussing any sensitive issue.
5. We will be recording these discussions because we want to capture everything you have to say accurately. But please be assured that we do not identify anyone by name in any report and your identity will remain anonymous.
6. Does anyone have any questions?

#### Explore participant background information

Now I would like everyone to introduce themselves. Can you please tell us your name, age, occupation if any, and for how long you have been in this community for?

| Theme                                                                                   | Discussion point                                                                                                                                                                                                    | Probes/clarifications                                                                                                                                                                                                                  |
|-----------------------------------------------------------------------------------------|---------------------------------------------------------------------------------------------------------------------------------------------------------------------------------------------------------------------|----------------------------------------------------------------------------------------------------------------------------------------------------------------------------------------------------------------------------------------|
| <b>Investigate the impact of aquatic disasters (natural and human) on the community</b> |                                                                                                                                                                                                                     |                                                                                                                                                                                                                                        |
| Awareness/<br>Perception<br>- <u>general</u>                                            | <ul style="list-style-type: none"> <li>▪ What are some major safety issues that arise during a disaster?</li> <li>▪ What about drowning? Who do you think is most at risk of drowning during a disaster?</li> </ul> | <ul style="list-style-type: none"> <li>- When have you previously felt unsafe during a disaster?</li> <li>- Are children/women/disabled people more prone to drowning during disasters?</li> </ul>                                     |
| <b>Explore current disaster preparedness practices/resilience</b>                       |                                                                                                                                                                                                                     |                                                                                                                                                                                                                                        |
| Risk behaviours                                                                         | <ul style="list-style-type: none"> <li>▪ What are some of the reasons community members drown during a disaster?</li> </ul>                                                                                         | <ul style="list-style-type: none"> <li>- What types of disaster cause an increased risk of drowning?</li> <li>- Are there appropriate facilities and services available to prevent drowning/assist people who are drowning?</li> </ul> |
| Current practices                                                                       | <ul style="list-style-type: none"> <li>▪ How do you ensure that you and your family are prepared for a disaster?</li> </ul>                                                                                         | <ul style="list-style-type: none"> <li>- What types of preparations do you make to your household prior to disaster? Where did you learn about these?</li> <li>- How do you receive warning when a disaster is approaching?</li> </ul> |

|                                                                                                                                                                                                                                                                                                                                                                            |                                                                                                                                                                                                                                  |                                                                                                                                                                                                                                                       |
|----------------------------------------------------------------------------------------------------------------------------------------------------------------------------------------------------------------------------------------------------------------------------------------------------------------------------------------------------------------------------|----------------------------------------------------------------------------------------------------------------------------------------------------------------------------------------------------------------------------------|-------------------------------------------------------------------------------------------------------------------------------------------------------------------------------------------------------------------------------------------------------|
|                                                                                                                                                                                                                                                                                                                                                                            |                                                                                                                                                                                                                                  | <ul style="list-style-type: none"> <li>- Do you and your household have an evacuation plan? What is it?</li> </ul>                                                                                                                                    |
| Barriers                                                                                                                                                                                                                                                                                                                                                                   | <ul style="list-style-type: none"> <li>- What are the barriers to ensuring you are prepared for disaster?</li> </ul>                                                                                                             | <ul style="list-style-type: none"> <li>- What are the main barriers to making appropriate safety preparations before a disaster occurs? How could these barriers be minimised?</li> </ul>                                                             |
| <b>Explore health seeking behaviours of disaster related drowning events</b>                                                                                                                                                                                                                                                                                               |                                                                                                                                                                                                                                  |                                                                                                                                                                                                                                                       |
| Experience of drowning events                                                                                                                                                                                                                                                                                                                                              | <ul style="list-style-type: none"> <li>▪ Do you know of any people who have drowned due to a disaster? If yes, please describe the event. Please describe the situation. What happened? How and when did this happen?</li> </ul> | <ul style="list-style-type: none"> <li>- Do you know if anyone attempted to help them? If yes, who and how?</li> <li>- How do you think this could have been prevented?</li> </ul>                                                                    |
| During drowning event                                                                                                                                                                                                                                                                                                                                                      | <ul style="list-style-type: none"> <li>- How are people usually rescued in drowning situations during a disaster?</li> </ul>                                                                                                     | <ul style="list-style-type: none"> <li>- Who are the people involved in the rescue and what are the associated risks for them?</li> </ul>                                                                                                             |
| Post drowning event                                                                                                                                                                                                                                                                                                                                                        | <ul style="list-style-type: none"> <li>- Do you know what the usual immediate practices are after a person is recovered from water?</li> </ul>                                                                                   | <ul style="list-style-type: none"> <li>- Would you personally be confident in administering these?</li> <li>- What health facilities are available to treat drowning during/directly following a disaster? Are these adequate/appropriate?</li> </ul> |
| <b>Understand role and measure in disaster relief management associated with drowning</b>                                                                                                                                                                                                                                                                                  |                                                                                                                                                                                                                                  |                                                                                                                                                                                                                                                       |
|                                                                                                                                                                                                                                                                                                                                                                            | <ul style="list-style-type: none"> <li>- What can be done to reduce the impact of a natural disaster in your community?</li> </ul>                                                                                               | <ul style="list-style-type: none"> <li>- What sort of programs, resources or facilities would be required for this?</li> <li>- Who do you think are best placed for implementing and overseeing this?</li> </ul>                                      |
|                                                                                                                                                                                                                                                                                                                                                                            | <ul style="list-style-type: none"> <li>- What is currently available to the community to prepare them for disaster?</li> </ul>                                                                                                   | <ul style="list-style-type: none"> <li>- Have you ever received any kind of information about natural disasters? If yes, from where/whom? What did you learn? Was it useful?</li> </ul>                                                               |
| <b>Exit question</b>                                                                                                                                                                                                                                                                                                                                                       |                                                                                                                                                                                                                                  |                                                                                                                                                                                                                                                       |
| <p>During our conversation, W, X, Y, Z measures were mentioned that could be taken to reduce drowning amongst fishermen. If you were to rank these from 1 to 5 (1 being most helpful and 5 least helpful for your community), what would the order be?</p> <p>Does anyone have any other questions or anything you would like to say or discuss further in this group?</p> |                                                                                                                                                                                                                                  |                                                                                                                                                                                                                                                       |
